# Supplementary material for: Synthesis, characterization and structures of 2-(3,5-dimethylpyrazol-1-yl)ethylseleno derivatives and their probable glutathione peroxidase (GPx) like activity
Source: Royal Society of Chemistry journal article supplement (doi:10.1039/c0ob00807a), 2011-01-01
Supplement: c0ob00807a.pdf [file c0ob00807a.pdf]

## Supplementary Material (ESI) for Organic and Biomolecular Chemistry

### Electronic Supplementary Information

## Synthesis, characterization and structures of 2-(3,5-dimethylpyrazol-1-yl)ethylseleno derivatives and their probable glutathione peroxidase (GPx) like activity

Ananda S. Hodage,<sup>a</sup> Prasad P. Phadnis,<sup>a</sup> Amey Wadawale,<sup>a</sup> K. I. Priyadarsini<sup>b</sup> and Vimal K. Jain<sup>\*a</sup>

<sup>a</sup> Chemistry Division, Bhabha Atomic Research Centre, Trombay, Mumbai 400 085, India.  
Email: jainvk@barc.gov.in, Fax: +91-22-2550-5151; Tel: +91-22-2559-5095

<sup>b</sup> Radiation and Photochemistry Division, Bhabha Atomic Research Centre, Trombay, Mumbai 400 085, India

### Table of Contents

1. Synthesis and characterization data of compounds **4 - 14**
2. Synthesis of dmpzCH<sub>2</sub>CH<sub>2</sub>Br
3. <sup>1</sup>H NMR, <sup>77</sup>Se{<sup>1</sup>H} NMR and LC-MS of the 2-(3, 5-dimethylpyrazol-1-yl) ethylseleno derivatives
4. Kinetic analysis data

## 1. Synthesis and characterization data of compounds 4 - 14

### **dmpzCH<sub>2</sub>CH<sub>2</sub>SeCH<sub>2</sub>CH<sub>2</sub>COOH (4)**

Colorless crystals (0.8 g, 59 %), m.p. 132-133 °C. Anal. Calcd. for C<sub>10</sub>H<sub>16</sub>N<sub>2</sub>O<sub>2</sub>Se<sub>1</sub>: Calcd.: C, 43.64; H, 5.86; N, 10.18 %. Found: C, 43.78; H, 5.93; N, 9.67 %. IR (neat) 3585 (ν OH), 1710 (ν CO). NMR spectral data (CDCl<sub>3</sub>): <sup>1</sup>H NMR: δ 2.21, 2.24 (each 3H, s, -CH<sub>3</sub>), 2.75-2.91 (6H, m, -CH<sub>2</sub>), 4.28 (2H, t, J = 8.0 Hz, -NCH<sub>2</sub>), 5.80 (1H, s, H-4 dmpz), 8.10 (br, OH); <sup>13</sup>C{<sup>1</sup>H} NMR: δ 10.9, 12.7 (each s, Me), 17.7 (<sup>1</sup>J<sub>C-Se</sub> = 62.0 Hz, SeCH<sub>2</sub>); 22.2 (<sup>1</sup>J<sub>C-Se</sub> = 68.0 Hz, SeCH<sub>2</sub>); 35.9 (CH<sub>2</sub>COOH), 49.0 (NCH<sub>2</sub>), 105.4, (C-4 dmpz), 139.3, 147.6 (each s, C-3, 5 dmpz), 175.1 (CO); <sup>77</sup>Se{<sup>1</sup>H} NMR: δ 166.9 ppm. MS (IT) m/z: 299 [M + Na]<sup>+</sup>, 277 [M + H]<sup>+</sup>, 203 [dmpzCH<sub>2</sub>CH<sub>2</sub>Se]<sup>+</sup>; 152 [SeCH<sub>2</sub>CH<sub>2</sub>COOH]<sup>+</sup>.

### **dmpzCH<sub>2</sub>CH<sub>2</sub>SeCH<sub>2</sub>CH<sub>2</sub>CH<sub>2</sub>COOH (5)**

Colorless solid (0.042 g, 60 %), m.p. 69-70 °C. IR (neat) 3080 (ν OH), 1710 (ν CO); NMR spectral data (CDCl<sub>3</sub>): <sup>1</sup>H NMR: δ 1.96 (m, SeCH<sub>2</sub>CH<sub>2</sub>CH<sub>2</sub>CO), 2.20, 2.25 (each 3H, s, -CH<sub>3</sub>), 2.43 (2H, t, J = 7.2 Hz, SeCH<sub>2</sub>CH<sub>2</sub>CH<sub>2</sub>CO), 2.53 (2H, t, J = 7.3 Hz, SeCH<sub>2</sub>CH<sub>2</sub>CH<sub>2</sub>CO), 2.90 (2H, t, J = 7.3 Hz, NCH<sub>2</sub>CH<sub>2</sub>Se), 4.24 (2H, t, J = 7.5 Hz, NCH<sub>2</sub>), 5.79 (1H, s, H-4 dmpz), 6.59 (br, OH); <sup>13</sup>C{<sup>1</sup>H} NMR: δ 11.2, 13.2 (each s, Me), 22.8 (<sup>1</sup>J<sub>C-Se</sub> = 67.0 Hz), 23.2 (<sup>1</sup>J<sub>C-Se</sub> = 63.0 Hz) (each SeCH<sub>2</sub>), 25.9 (CH<sub>2</sub>CH<sub>2</sub>CO), 34.2 (CH<sub>2</sub>CO), 49.2 (NCH<sub>2</sub>), 105.4 (C-4 dmpz), 139.4, 147.9 (each s, C-3, 5 dmpz), 176.7 (CO); <sup>77</sup>Se{<sup>1</sup>H} NMR: δ 148.9 ppm. MS (IT) m/z: 313 [M + Na]<sup>+</sup>, 289 [M + H]<sup>+</sup>, 203 [dmpzCH<sub>2</sub>CH<sub>2</sub>Se]<sup>+</sup>, 166 [SeCH<sub>2</sub>CH<sub>2</sub>CH<sub>2</sub>COOH]<sup>+</sup>.

### **dmpzCH<sub>2</sub>CH<sub>2</sub>SeCH<sub>2</sub>COOCH<sub>2</sub>CH<sub>3</sub> (6)**

Pale yellow liquid (0.1 g, 84 %). IR (neat): 1730 (ν CO); NMR spectral data (CDCl<sub>3</sub>): <sup>1</sup>H NMR: δ 1.23 (3H, t, J = 7.0 Hz, -COOCH<sub>2</sub>CH<sub>3</sub>), 2.16, 2.22 (each 3H, s, -CH<sub>3</sub>); 3.03 (SeCH<sub>2</sub>CO), 3.07 (t, J = 7.0 Hz, SeCH<sub>2</sub>), 4.12 (2H, q, J = 7.0 Hz, -COOCH<sub>2</sub>CH<sub>3</sub>), 4.22 (2H, t, J = 7.0 Hz, NCH<sub>2</sub>), 5.74 (1H, s, H-4 dmpz); <sup>13</sup>C{<sup>1</sup>H} NMR: δ 11.0, 13.5 (each s, Me), 14.1 (CH<sub>2</sub>Me), 22.5 (<sup>1</sup>J<sub>C-Se</sub> = 69.0 Hz), 24.7 (<sup>1</sup>J<sub>C-Se</sub> = 67.0 Hz) (each SeCH<sub>2</sub>), 48.6 (NCH<sub>2</sub>), 61.3 (COOCH<sub>2</sub>), 105.1 (C-4 dmpz), 138.9, 147.8 (each s, C-3, 5 dmpz), 171.4 (CO); <sup>77</sup>Se{<sup>1</sup>H} NMR δ: 202.4 ppm. MS (IT) m/z: 291 [M + H]<sup>+</sup>, 261 [M - Et]<sup>+</sup>, 203 [dmpzCH<sub>2</sub>CH<sub>2</sub>Se]<sup>+</sup>.

### **dmpzCH<sub>2</sub>CH<sub>2</sub>SeCH<sub>2</sub>CH<sub>2</sub>COOCH<sub>2</sub>CH<sub>3</sub> (7)**

Pale yellow liquid (0.095 g, 86%). IR (neat): 1730 (ν CO); NMR spectral data (CDCl<sub>3</sub>): <sup>1</sup>H NMR: δ 1.25 (3H, t, J = 7.1 Hz, -COOCH<sub>2</sub>CH<sub>3</sub>), 2.20, 2.26 (each 3H, s, -CH<sub>3</sub>), 2.64 (4H, s, SeCH<sub>2</sub>CH<sub>2</sub>COO), 2.96 (2H, t, J = 7.2 Hz, NCH<sub>2</sub>), 4.13 (2H, q, J = 7.2 Hz, -COOCH<sub>2</sub>CH<sub>3</sub>), 4.20 (2H, t, J = 7.2 Hz, NCH<sub>2</sub>CH<sub>2</sub>Se), 5.78 (1H, s, H-

4 dmpz);  $^{13}\text{C}\{^1\text{H}\}$  NMR:  $\delta$  11.0, 13.3 (each s, *Me*), 14.0 ( $\text{COOCH}_2\text{Me}$ ), 17.6 ( $^1J_{\text{C-Se}} = 63.0$  Hz,  $\text{SeCH}_2\text{CH}_2\text{CO}$ ), 23.3 ( $^1J_{\text{C-Se}} = 67.0$  Hz,  $\text{SeCH}_2\text{CH}_2\text{NH}_2$ ), 35.5 ( $\text{CH}_2\text{CO}$ ), 49.0 ( $\text{NCH}_2$ ), 60.5 ( $\text{OCH}_2$ ), 104.9 (C-4 dmpz), 138.9, 147.7 (C-3, 5 dmpz), 172.0 (CO);  $^{77}\text{Se}\{^1\text{H}\}$  NMR:  $\delta$  171.1 ppm. MS (IT)  $m/z$ : 327  $[\text{M} + \text{Na}]^+$ , 305  $[\text{M} + \text{H}]^+$ , 275  $[\text{M} - \text{Et}]^+$ , 207  $[\text{M-dmpz}]^+$ , 179  $[\text{SeCH}_2\text{CH}_2\text{COOEt}]^+$ .

#### **dmpzCH<sub>2</sub>CH<sub>2</sub>SeCH<sub>2</sub>CH<sub>2</sub>CH<sub>2</sub>COOCH<sub>2</sub>CH<sub>3</sub> (8)**

Pale yellow liquid (0.58 g, 91%). IR (neat): 1730 ( $\nu$  CO); NMR spectral data ( $\text{CDCl}_3$ ):  $^1\text{H}$  NMR:  $\delta$  1.22 (3H, t,  $J = 7.0$ ,  $-\text{COOCH}_2\text{CH}_3$ ), 1.89 (m,  $\text{SeCH}_2\text{CH}_2$ ), 2.17, 2.23 (6H, each s,  $-\text{CH}_3$ ), 2.34 (2H, t,  $J = 7.0$  Hz,  $-\text{SeCH}_2$ ), 2.45 (2H, t,  $J = 7.3$  Hz,  $-\text{CH}_2\text{CO}$ ), 2.89 (2H, t,  $J = 7.2$  Hz,  $\text{CH}_2\text{Se-}$ ), 4.08 (2H, qr,  $J = 7.1$  Hz,  $-\text{COOCH}_2\text{CH}_3$ ), 4.16 (2H, t,  $J = 7.3$  Hz,  $\text{NCH}_2$ ), 5.75 (1H, s, H-4 dmpz);  $^{13}\text{C}\{^1\text{H}\}$  NMR:  $\delta$  11.2, 13.5 (each s, *Me*), 14.2 ( $\text{COCH}_2\text{Me}$ ), 23.1 ( $^1J_{\text{C-Se}} = 67.0$ ), 23.2 ( $^1J_{\text{C-Se}} = 62.0$  Hz) (each  $\text{SeCH}_2$ ), 25.6 ( $-\text{CH}_2-$ ), 34.0 ( $\text{CH}_2\text{CO}$ ), 49.3 ( $\text{NCH}_2$ ), 60.4 ( $\text{COCH}_2$ ), 105.0 (C-4 dmpz), 138.9, 147.6 (C-3, 5 dmpz), 172.9 (CO);  $^{77}\text{Se}\{^1\text{H}\}$  NMR:  $\delta$  147.0 ppm. MS (IT)  $m/z$ : 341  $[\text{M} + \text{Na}]^+$ , 319  $[\text{M} + \text{H}]^+$ , 289  $[\text{M} - \text{Et}]^+$ , 221  $[\text{M-dmpz}]^+$ , 193  $[\text{SeCH}_2\text{CH}_2\text{CH}_2\text{COOEt}]^+$ .

#### **dmpzCH<sub>2</sub>CH<sub>2</sub>SeCH<sub>2</sub>Ph (9)**

Pale yellow liquid (0.55 g, 76 %). Anal. Calcd. for  $\text{C}_{14}\text{H}_{18}\text{N}_2\text{Se}$ : Calcd.: C, 57.34; H, 6.19; N, 9.55 %. Found: C, 57.11; H, 6.21; N, 9.31 %. NMR spectral data ( $\text{CDCl}_3$ ):  $^1\text{H}$  NMR:  $\delta$  2.18, 2.21 (each 3H, s,  $-\text{CH}_3$ ), 2.87 (2H, t,  $J = 7.1$  Hz,  $-\text{CH}_2\text{Se}$ ), 3.59 (2H, s,  $J_{\text{Se-H}} = 6.3$  Hz,  $-\text{SeCH}_2\text{Ph}$ ), 4.12 (2H, t,  $J = 7.1$ ,  $-\text{CH}_2\text{N}$ ), 5.77 (1H, s, H-4 dmpz), 7.19-7.30 (5H, m, *Ph-H*);  $^{13}\text{C}\{^1\text{H}\}$  NMR:  $\delta$  10.9, 13.3 (each s, *Me*), 23.1 ( $^1J_{\text{C-Se}} = 69.0$  Hz,  $\text{SeCH}_2$ ), 26.9 ( $^1J_{\text{C-Se}} = 59.0$  Hz,  $\text{SeCH}_2\text{Ph}$ ), 48.9 ( $\text{NCH}_2$ ), 104.7 (C-4 dmpz), 126.6, 128.3, 128.6, 138.8 (Ph); 138.9, 147.3 (each s, C-3, 5 dmpz);  $^{77}\text{Se}\{^1\text{H}\}$  NMR:  $\delta$  244.6 ppm. MS (IT)  $m/z$ : 317  $[\text{M} + \text{Na}]^+$ , 295  $[\text{M} + \text{H}]^+$ , 267, 197.

#### **dmpzCH<sub>2</sub>CH<sub>2</sub>SeCH<sub>2</sub>CH=CH<sub>2</sub> (10)**

Pale yellow liquid (0.12 g, 67 %). NMR spectral data ( $\text{CDCl}_3$ ):  $^1\text{H}$  NMR:  $\delta$  2.20, 2.25 (each 3H, s,  $-\text{CH}_3$ ), 2.87 (2H, t,  $J = 7.2$  Hz,  $-\text{CH}_2\text{Se}$ ); 3.02 (2H, d,  $J = 4.5$  Hz,  $-\text{CH}_2\text{CH}=\text{CH}_2$ ), 4.18 (2H, t,  $J = 7.2$  Hz,  $-\text{CH}_2\text{N}$ ), 4.98-5.05 (2H, m,  $-\text{CH}_2\text{CH}=\text{CH}_2$ ), 5.77 (1H, s, H-4 dmpz); 5.84 (1H, m,  $-\text{CH}_2\text{CH}=\text{CH}_2$ );  $^{13}\text{C}\{^1\text{H}\}$  NMR:  $\delta$  11.1, 13.4 (each s, *Me*), 22.4 ( $^1J_{\text{C-Se}} = 69.0$  Hz,  $\text{SeCH}_2$ ), 26.0 ( $^1J_{\text{C-Se}} = 57.0$  Hz,  $\text{SeCH}_2=\text{CH}$ ), 49.0 ( $\text{NCH}_2$ ), 105.0 (C-4 dmpz), 116.6 ( $\text{CH}_2=$ ), 134.6 ( $=\text{CH}$ ), 139.0, 147.5 (each s, C-3, 5 dmpz);  $^{77}\text{Se}\{^1\text{H}\}$  NMR:  $\delta$  182 ppm. MS (IT)  $m/z$ : 267  $[\text{M} + \text{Na}]^+$ , 245  $[\text{M} + \text{H}]^+$ , 203  $[\text{dmpzCH}_2\text{CH}_2\text{Se}]^+$ .

**dmpzCH<sub>2</sub>CH<sub>2</sub>SeCH<sub>2</sub>CH<sub>2</sub>NH<sub>2</sub> (11)**

Yellow liquid (0.146 g, 24 %). IR (neat): 3350 ( $\nu$  NH<sub>2</sub>). NMR spectral data (CDCl<sub>3</sub>): <sup>1</sup>H NMR:  $\delta$  2.12, 2.18 (each 3H, s, -CH<sub>3</sub>), 2.66 (2H, t,  $J$  = 6.6 Hz, SeCH<sub>2</sub>CH<sub>2</sub>NH<sub>2</sub>), 2.89 ((2H, t,  $J$  = 7.4 Hz, SeCH<sub>2</sub>CH<sub>2</sub>dmpz), 3.00 ((2H, t,  $J$  = 6.6 Hz, SeCH<sub>2</sub>CH<sub>2</sub>NH<sub>2</sub>), 4.17 (2H, t,  $J$  = 7.4 Hz, -SeCH<sub>2</sub>CH<sub>2</sub>dmpz), 4.68 (2H, s, br, -NH<sub>2</sub>), 5.71 (1H, s, H-4 dmpz); <sup>13</sup>C{<sup>1</sup>H} NMR:  $\delta$  11.0, 13.2 (each s, Me), 23.0 (<sup>1</sup> $J_{C-Se}$  = 66.0 Hz) 24.4 (<sup>1</sup> $J_{C-Se}$  = 62.0 Hz) (each SeCH<sub>2</sub>), 40.9 (CH<sub>2</sub>NH<sub>2</sub>), 48.8 (NCH<sub>2</sub>), 104.8 (C-4 dmpz), 139.0, 147.4 (each s, C-3, 5 dmpz); <sup>77</sup>Se{<sup>1</sup>H} NMR:  $\delta$  118.9 ppm. MS (IT)  $m/z$ : 288 [M + K]<sup>+</sup>, 248 [M + H]<sup>+</sup>, 203 [dmpzCH<sub>2</sub>CH<sub>2</sub>Se]<sup>+</sup>.

**dmpzCH<sub>2</sub>CH<sub>2</sub>SeCH<sub>2</sub>CH<sub>2</sub>NH<sub>2</sub>·2HCl (12)**

To a stirred methanol solution (25 ml) of dmpzCH<sub>2</sub>CH<sub>2</sub>SeCH<sub>2</sub>CH<sub>2</sub>NH<sub>2</sub> (0.14 g, 0.56 mmol), concentrated HCl was added till solution became acidic. The reaction mixture was stirred at ~ 45-50 °C for 2 h and then allowed to cool to room temperature. The solvent was evaporated *in vacuo* to yield a hygroscopic colorless solid (0.096 g, 60 %), m.p. 163-164 °C. IR: 3260 ( $\nu$  NH<sub>2</sub>). NMR spectral data (D<sub>2</sub>O): <sup>1</sup>H NMR:  $\delta$  2.18, 2.23 (each 3H, s, -CH<sub>3</sub>), 2.59 (2H, t,  $J$  = 7.0 Hz, -CH<sub>2</sub>Se), 2.87 (2H, t,  $J$  = 6.7 Hz, -CH<sub>2</sub>CH<sub>2</sub>NH<sub>2</sub>), 3.05 (2H, t,  $J$  = 6.6 Hz, -CH<sub>2</sub>CH<sub>2</sub>NH<sub>2</sub>), 4.36 (2H, t,  $J$  = 6.9 Hz, -CH<sub>2</sub>N), 6.15 (1H, s, Ar-H); <sup>13</sup>C{<sup>1</sup>H} NMR:  $\delta$  10.1, 10.3 (each s, Me), 19.6 (<sup>1</sup> $J_{C-Se}$  = 67.0 Hz), 21.6 (<sup>1</sup> $J_{C-Se}$  = 68.0 Hz) (each SeCH<sub>2</sub>), 39.2 (CH<sub>2</sub>NH<sub>2</sub>), 48.1 (NCH<sub>2</sub>), 107.5 (C-4 dmpz), 145.7, 146.3 (each s, C-3, 5 dmpz); <sup>77</sup>Se{<sup>1</sup>H} NMR:  $\delta$  119.7 ppm. MS (IT)  $m/z$ : 319 [M]<sup>+</sup>, 291, 248 [MH-2HCl], 203 [dmpzCH<sub>2</sub>CH<sub>2</sub>Se]<sup>+</sup>.

**dmpzCH<sub>2</sub>CH<sub>2</sub>SeC<sub>5</sub>H<sub>4</sub>N (13)**

To an ice cold ethanolic solution of di-2-pyridyl diselenide (py<sub>2</sub>Se<sub>2</sub>) (0.6 g, 1.91 mmol), sodium borohydride (0.16 g, 4.22 mmol) was added with stirring. The yellow solution faded to colorless, the reaction mixture was allowed to warm to room temperature. To this dmpzCH<sub>2</sub>CH<sub>2</sub>Br (0.775 g, 3.82 mmol) was added and stirred further for 2 h. The solvent was evaporated *in vacuo* and the residue was dissolved in water and extracted with diethyl ether (3 x 50 ml) which on evaporation *in vacuo* afforded a yellow oil which was purified by column chromatography with ethyl acetate-hexane mixture (30:70) to give a pale yellow oil (0.7 g, 66 %). Anal. Calcd. for C<sub>12</sub>H<sub>15</sub>N<sub>3</sub>Se: Calcd.: C, 51.43; H, 5.40; N, 14.99 %. Found: C, 50.83; H, 5.38; N, 14.39 %. NMR spectral data (CDCl<sub>3</sub>): <sup>1</sup>H NMR:  $\delta$  2.20, 2.24 (each 3H, s, -CH<sub>3</sub>), 3.48 (2H, t,  $J$  = 7.5 Hz, -SeCH<sub>2</sub>), 4.33 (2H, t,  $J$  = 7.5 Hz, -NCH<sub>2</sub>), 5.74 (1H, s, H-4 dmpz), 7.00 (1H, t,  $J$  = 6.0 Hz, C<sub>5</sub>H<sub>4</sub>N), 7.29 (1H, d,  $J$  = 7.8 Hz, C<sub>5</sub>H<sub>4</sub>N), 7.41 (1H, td,  $J$  = 8.6 Hz, C<sub>5</sub>H<sub>4</sub>N), 8.43 (1H, d,  $J$  = 4.2 Hz, C<sub>5</sub>H<sub>4</sub>N); <sup>13</sup>C{<sup>1</sup>H} NMR:  $\delta$  10.9, 13.4 (s, Me), 24.8 (<sup>1</sup> $J_{C-Se}$  = 65.0 Hz, CH<sub>2</sub>Se), 48.5 (NCH<sub>2</sub>), 104.7 (C-4 dmpz), 120.4,

125.4 ( $^1J_{C-Se} = 30.0$  Hz), 135.8, 139.1, 147.6 (C-3, 5 dmpz), 150.0, 154.2;  $^{77}Se\{^1H\}$  NMR:  $\delta$  321.7 ppm. MS (IT)  $m/z$ : 304  $[M + Na]^+$ , 282  $[M + H]^+$ , 254, 186  $[pySeCH_2CH_2]^+$ .

**dmpzCH<sub>2</sub>CH<sub>2</sub>SeCH<sub>2</sub>C<sub>6</sub>H<sub>4</sub>(*p*-OTs) (14)**

By using compound ClCH<sub>2</sub>C<sub>6</sub>H<sub>4</sub>(*o*-OTs) the title compound dmpzCH<sub>2</sub>CH<sub>2</sub>SeCH<sub>2</sub>Ph(*o*-OTs) (**14**) was prepared as a yellow liquid (0.658 g, 61 %). Anal. Calcd. for C<sub>21</sub>H<sub>24</sub>N<sub>2</sub>O<sub>3</sub>SSe: Calcd.: C, 54.42; H, 5.22; N, 6.04 %. Found: C, 53.93; H, 5.34; N, 5.66 %. NMR spectral data (CDCl<sub>3</sub>):  $^1H$  NMR:  $\delta$  2.18 (6H, s, -CH<sub>3</sub>), 2.41 (3H, s, OTs-CH<sub>3</sub>), 2.84 (2H, t,  $J = 7.0$  Hz, -CH<sub>2</sub>Se), 3.50 (2H, s,  $J_{Se-H} = 6.3$  Hz, CH<sub>2</sub>-Ph), 4.10 (2H, t,  $J = 7.2$  Hz, -CH<sub>2</sub>N), 5.74 (1H, s, Ar-H), 6.95 (1H, d,  $J = 8.1$  Hz, Ar-H), 7.08-7.18 (2H, m, Ar-H), 7.30 (3H, d,  $J = 7.8$  Hz, Ar-H), 7.73 (2H, d,  $J = 8.1$  Hz, Ar-H);  $^{13}C\{^1H\}$  NMR:  $\delta$  10.9, 13.3 (each s, Me), 20.5 ( $^1J_{C-Se} = 62.0$  Hz), 21.5, 23.5 ( $^1J_{C-Se} = 69.0$  Hz), 48.7, 104.8, 122.1, 127.1, 127.9, 128.1, 129.7, 131.1, 132.6, 132.9, 139.0, 145.5, 147.3, 147.4;  $^{77}Se\{^1H\}$  NMR:  $\delta$  240.6 ppm. MS (IT)  $m/z$ : 465  $[M + H]^+$ , 369  $[M - dmpz]^+$ , 203  $[dmpzCH_2CH_2Se]^+$ .

## 2. Synthesis of $\text{dmpzCH}_2\text{CH}_2\text{Br}$ (a)

To a well stirred mixture of crushed NaOH (2.08 g, 52.0 mmol) and tetra-*n*-butyl ammonium bromide (TBAB) (0.167 g, 0.52 mmol) in a dichloromethane (50 ml) at 0-5 °C for 1 h, 3, 5-dimethylpyrazole (0.5 g, 5.2 mmol) and 1, 2-dibromoethane (1.57 ml, 3.41 g, 18.22 mmol) were added. The reaction mixture was stirred for 30 h at room temperature and the progress of the reaction was monitored by TLC. The reaction mixture was filtered and the filtrate was evaporated *in vacuo* to give a pale yellow oil which was purified by column chromatography using ethyl acetate-hexane mixture (30:70) as an eluent. The solvents were evaporated on a Rotavap to give a pale yellow liquid (0.7 g, 66 %). NMR spectral data ( $\text{CDCl}_3$ ):  $^1\text{H}$  NMR:  $\delta$  2.19, 2.25 (each 3H, s,  $-\text{CH}_3$ ), 3.66 (2H, t,  $J = 6.6$  Hz,  $-\text{CH}_2\text{Br}$ ), 4.29 (2H, t,  $J = 6.6$  Hz,  $-\text{NCH}_2\text{CH}_2\text{Br}$ ), 5.77 (1H, s, H-4 dmpz).

### 1. Synthesis of tosylated precursors

#### Tosylation of salicylaldehyde [2-(4-OTs) $\text{C}_6\text{H}_4\text{CHO}$ ] (b)

Salicylaldehyde (5.0 g, 40.94 mmol) was dissolved in pyridine (50 ml) and the solution was cooled at 0 °C. Tosyl chloride (4-Me $\text{C}_6\text{H}_4\text{SO}_2\text{Cl}$ ) (7.8 g, 40.94 mmol) was added and stirred overnight to get a white precipitate. To this reaction mixture, distilled water (50 ml) was added and extracted with diethyl ether. The organic extract was washed with dilute HCl followed by dilute NaOH. The solvent was evaporated *in vacuo* to yield a white crystalline solid (10.7 g, 94 %). NMR spectral data ( $\text{CDCl}_3$ ):  $^1\text{H}$  NMR:  $\delta$  2.45 (3H, s,  $-\text{CH}_3$ ), 7.20 (1H, d,  $J = 8.1$  Hz, Ar-*H*), 7.33 (2H, d,  $J = 8.1$  Hz, Ar-*H*), 7.39 (1H, t,  $J = 7.6$  Hz, Ar-*H*), 7.58 (1H, td,  $^1J = 7.1$  Hz,  $^2J = 1.5$  Hz, Ar-*H*), 7.63 (2H, d,  $J = 8.4$  Hz, Ar-*H*), 7.86 (1H, dd,  $^1J = 7.8$  Hz,  $^2J = 1.8$  Hz, Ar-*H*), 9.99 (1H, s,  $-\text{CHO}$ ).

#### Synthesis of [2-(4-OTs) $\text{C}_6\text{H}_4\text{CH}_2\text{OH}$ ] (c)

To a stirred methanol solution (200 ml) of **b** (43.0 g, 155.62 mmol), sodium borohydride (7.1 g, 187.7 mmol) was added slowly with constant stirring at 0 °C. The progress of reaction was monitored by TLC and after completion of reaction (~ 4 h) methanol was evaporated *in vacuo*. The residue was then dissolved in water and extracted with ethyl acetate (3 x 150 ml). The crude product obtained on evaporation of ethyl acetate *in vacuo* was purified on column chromatography with ethyl acetate and hexane mixture (20:80) to yield **c** as a colorless oil (37.6 g, 87 %). NMR spectral data ( $\text{CDCl}_3$ ):  $^1\text{H}$  NMR:  $\delta$  2.47 (3H, s,  $-\text{CH}_3$ ), 4.58 (2H, s, Ar $\text{CH}_2$ ), 6.86

(1H, d,  $J = 8.1$  Hz, Ar-*H*), 7.20 (1H, t,  $J = 7.0$  Hz, Ar-*H*), 7.28 (1H, t,  $J = 7.2$  Hz, Ar-*H*), 7.35 (2H, d,  $J = 8.1$  Hz, Ar-*H*), 7.51 (1H, d,  $J = 7.5$  Hz, Ar-*H*), 7.7 (1H, d,  $J = 8.4$  Hz, Ar-*H*).

### Synthesis of [2-(4-OTs)C<sub>6</sub>H<sub>4</sub>CH<sub>2</sub>Cl] (d)

A 500 ml two necked round bottom flask was charged with 70 ml SOCl<sub>2</sub> and immersed in a tub containing ice-salt mixture. To this, a pyridine (40 ml) solution of **c** (43.0 g, 154.5 mmol) was added drop wise through a dropping funnel with vigorous stirring. (*Caution: The reaction is highly exothermic, gives SO<sub>2</sub> and HCl fumes. Also pyridine is known to hazardous for health. Hence the reaction must be carried out in a well ventilated fume hood*). The temperature was maintained below 0 °C till complete addition of **c** (~ 2 h). The reaction mixture was brought to room temperature. It was then stirred further for 5 h and poured in a chilled (-5 to 10 °C) 40 % HCl very slowly with constant stirring. The reaction mixture was then extracted with ethyl acetate (3 x 100 ml) and on evaporation of organic solvent *in vacuo* gave a pinkish-white pure crystalline solid **d** was obtained (42.5 g, 93 %). M.p. 52 °C. NMR spectral data (CDCl<sub>3</sub>): <sup>1</sup>H NMR: δ 2.45 (3H, s, -CH<sub>3</sub>), 4.47 (2H, s, ArCH<sub>2</sub>), 7.06 (1H, m, Ar-*H*), 7.26 (2H, m, Ar-*H*), 7.43 (2H, d,  $J = 8.1$  Hz, Ar-*H*), 7.46 (1H, m, Ar-*H*), 7.76 (2H, d,  $J = 8.4$  Hz, Ar-*H*); <sup>13</sup>C{<sup>1</sup>H} NMR: δ 21.8, 40.3, 122.6, 127.5, 128.5, 129.8, 130.1, 131.0, 131.1, 132.5, 145.9, 147.3.

**3.  $^1\text{H}$  NMR,  $^{77}\text{Se}\{^1\text{H}\}$  NMR and LC-MS of the 2-(3, 5-dimethylpyrazol-1-yl) ethylseleno derivatives**



**(dmpzCH<sub>2</sub>CH<sub>2</sub>)<sub>2</sub>Se (1):**

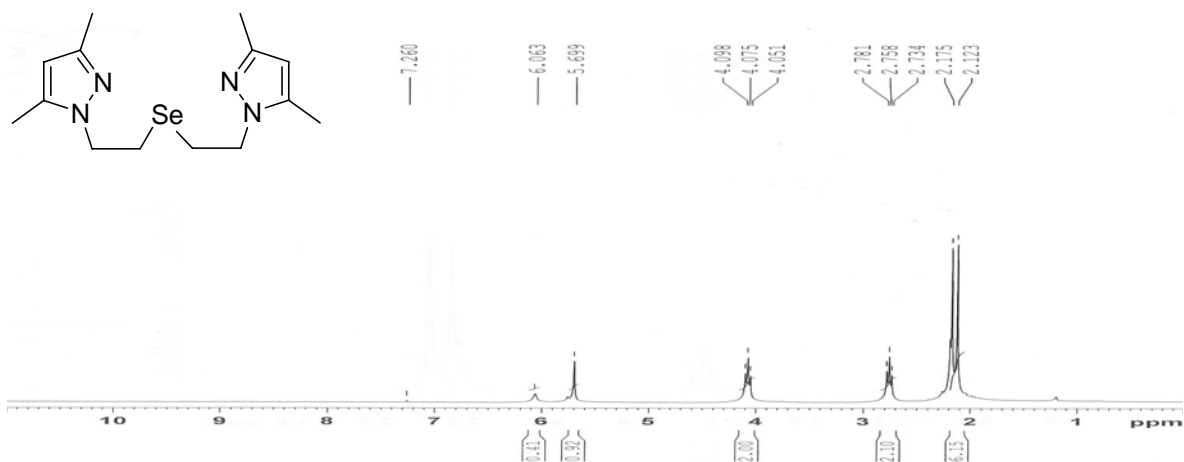

<sup>1</sup>H NMR (CDCl<sub>3</sub>) of (dmpzCH<sub>2</sub>CH<sub>2</sub>)<sub>2</sub>Se

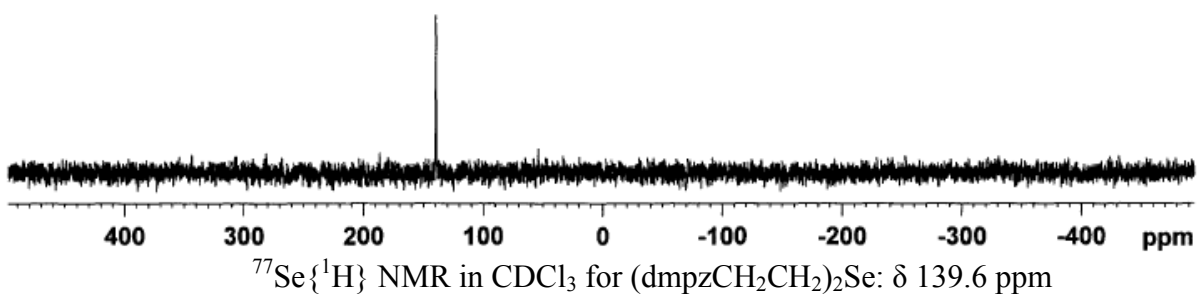

<sup>77</sup>Se{<sup>1</sup>H} NMR in CDCl<sub>3</sub> for (dmpzCH<sub>2</sub>CH<sub>2</sub>)<sub>2</sub>Se: δ 139.6 ppm

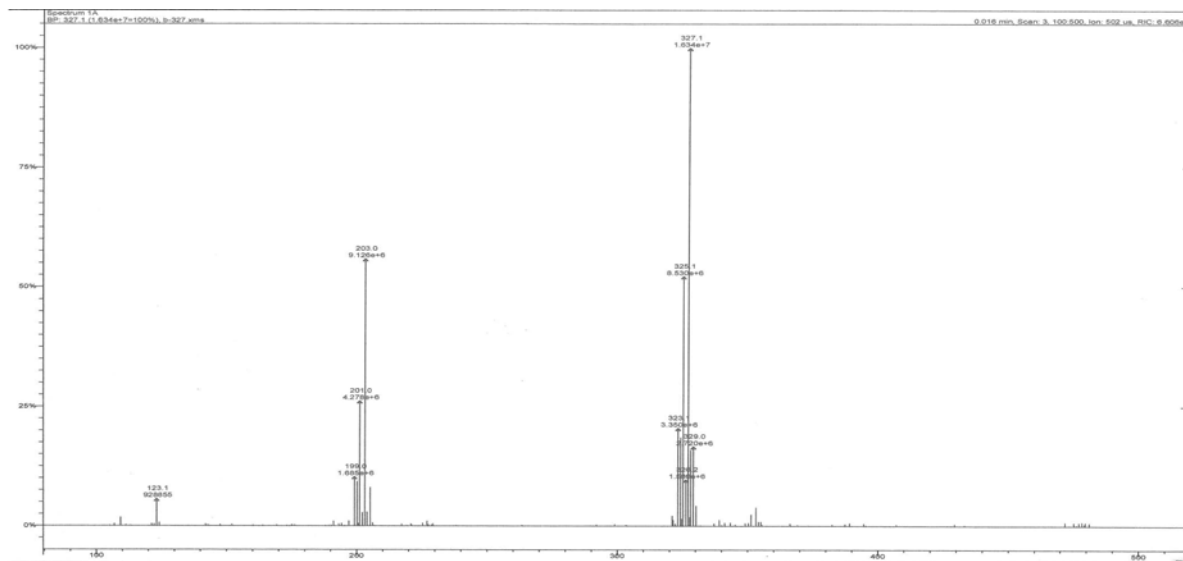

LC-MS of (dmpzCH<sub>2</sub>CH<sub>2</sub>)<sub>2</sub>Se

**(dmpzCH<sub>2</sub>CH<sub>2</sub>Se)<sub>2</sub> (2):**

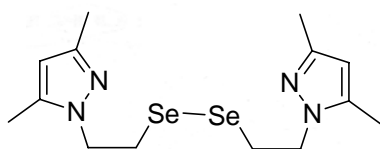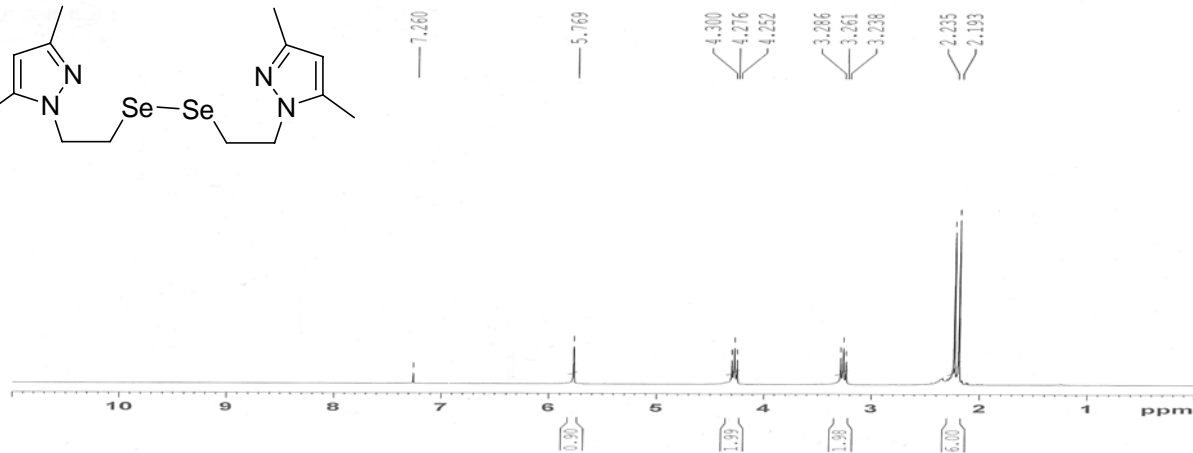

<sup>1</sup>H NMR (CDCl<sub>3</sub>) of (dmpzCH<sub>2</sub>CH<sub>2</sub>Se)<sub>2</sub>

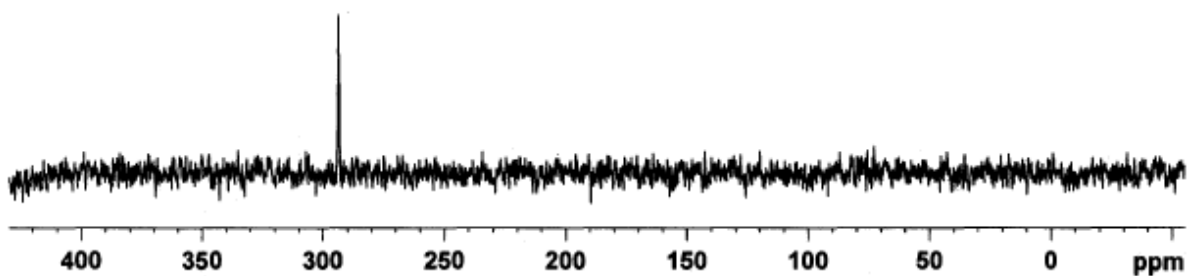

<sup>77</sup>Se{<sup>1</sup>H} NMR in CDCl<sub>3</sub> for (dmpzCH<sub>2</sub>CH<sub>2</sub>Se)<sub>2</sub>: δ 293.5 ppm

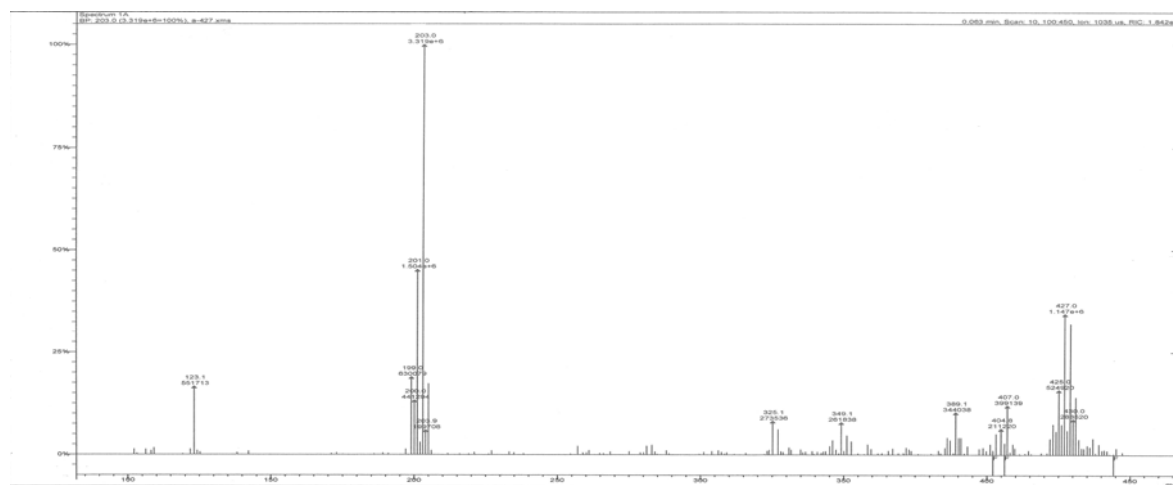

LC-MS of (dmpzCH<sub>2</sub>CH<sub>2</sub>Se)<sub>2</sub>

**dmpzCH<sub>2</sub>CH<sub>2</sub>SeCH<sub>2</sub>COOH (3):**

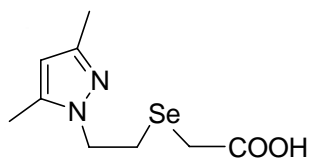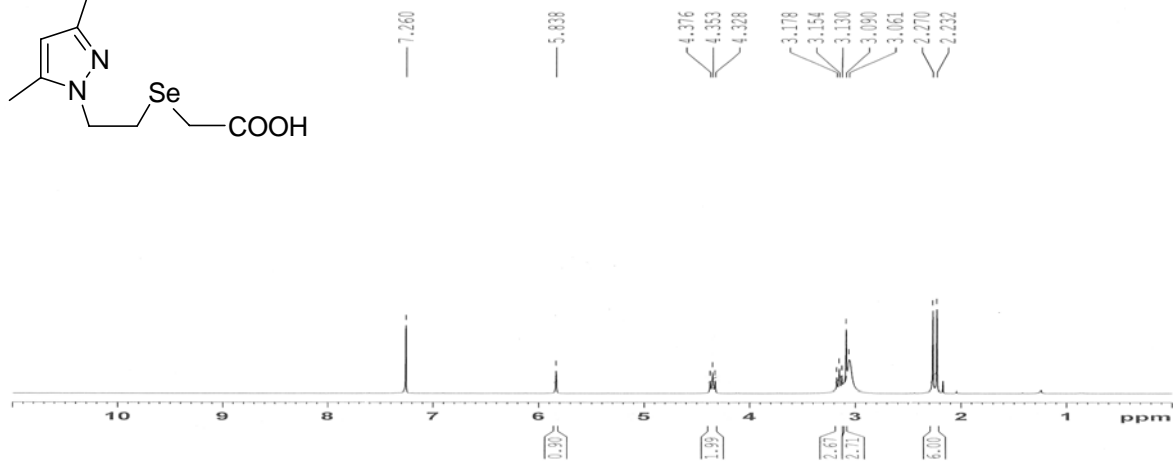

<sup>1</sup>H NMR (CDCl<sub>3</sub>) of dmpzCH<sub>2</sub>CH<sub>2</sub>SeCH<sub>2</sub>COOH

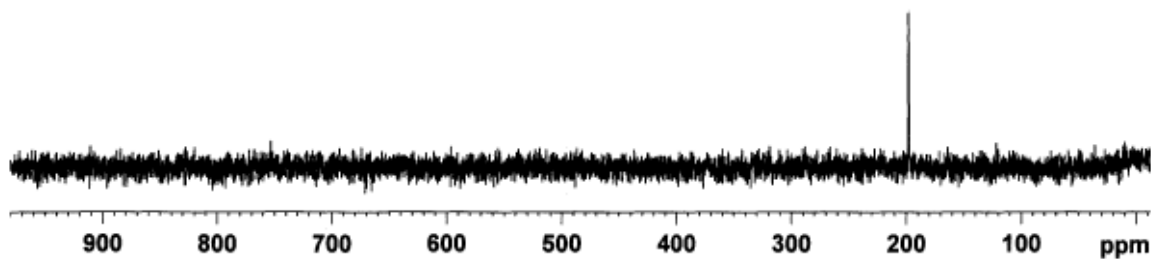

<sup>77</sup>Se{<sup>1</sup>H} NMR in CDCl<sub>3</sub> for dmpzCH<sub>2</sub>CH<sub>2</sub>SeCH<sub>2</sub>COOH: δ 198.0 ppm

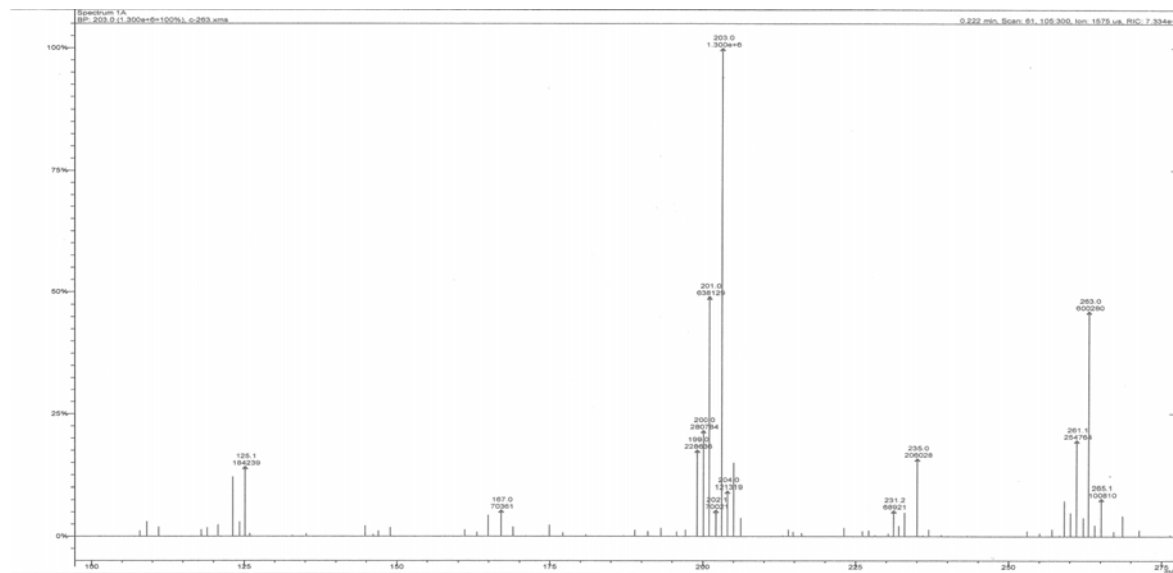

LC-MS of dmpzCH<sub>2</sub>CH<sub>2</sub>SeCH<sub>2</sub>COOH



**dmpzCH<sub>2</sub>CH<sub>2</sub>SeCH<sub>2</sub>CH<sub>2</sub>CH<sub>2</sub>COOH (5):**

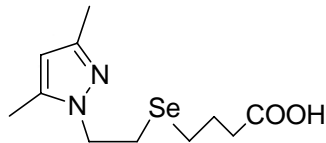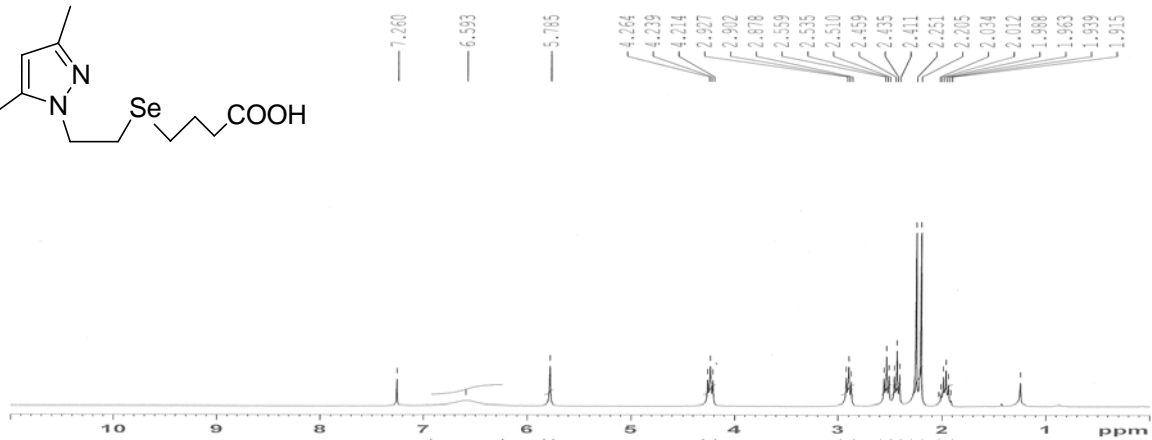

<sup>1</sup>H NMR (CDCl<sub>3</sub>) of dmpzCH<sub>2</sub>CH<sub>2</sub>SeCH<sub>2</sub>CH<sub>2</sub>CH<sub>2</sub>COOH

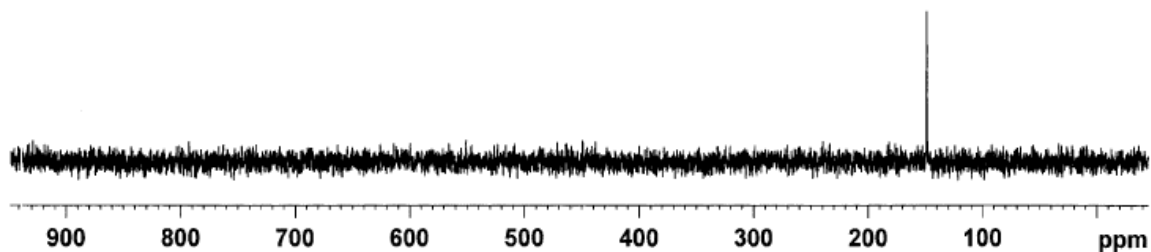

<sup>77</sup>Se{<sup>1</sup>H} NMR in CDCl<sub>3</sub> for dmpzCH<sub>2</sub>CH<sub>2</sub>SeCH<sub>2</sub>CH<sub>2</sub>CH<sub>2</sub>COOH: δ 148.8 ppm

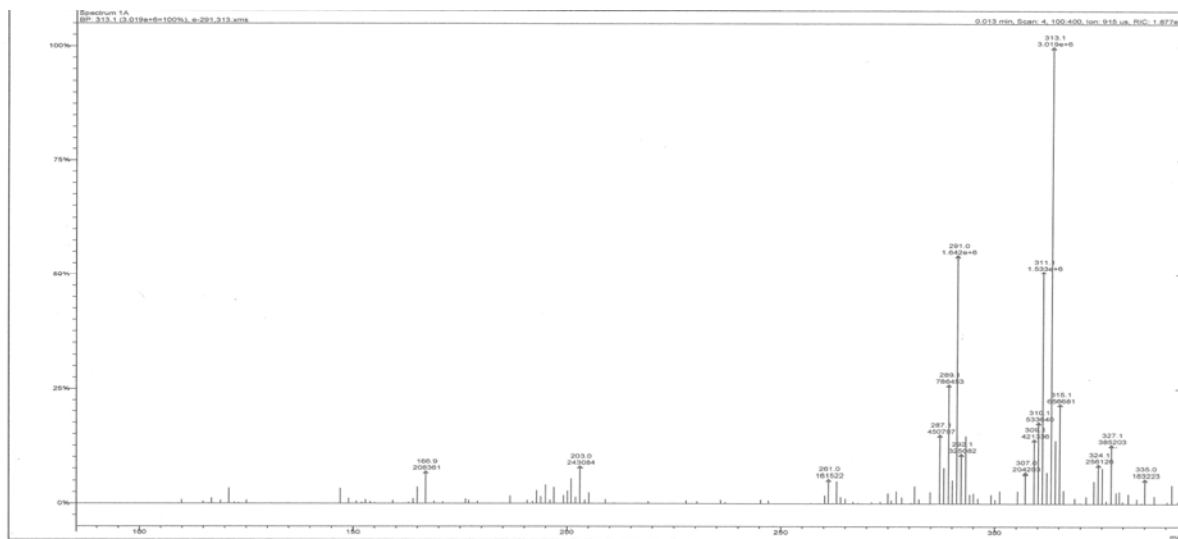

LC-MS of dmpzCH<sub>2</sub>CH<sub>2</sub>SeCH<sub>2</sub>CH<sub>2</sub>CH<sub>2</sub>COOH

**dmpzCH<sub>2</sub>CH<sub>2</sub>SeCH<sub>2</sub>COOCH<sub>2</sub>CH<sub>3</sub> (6):**

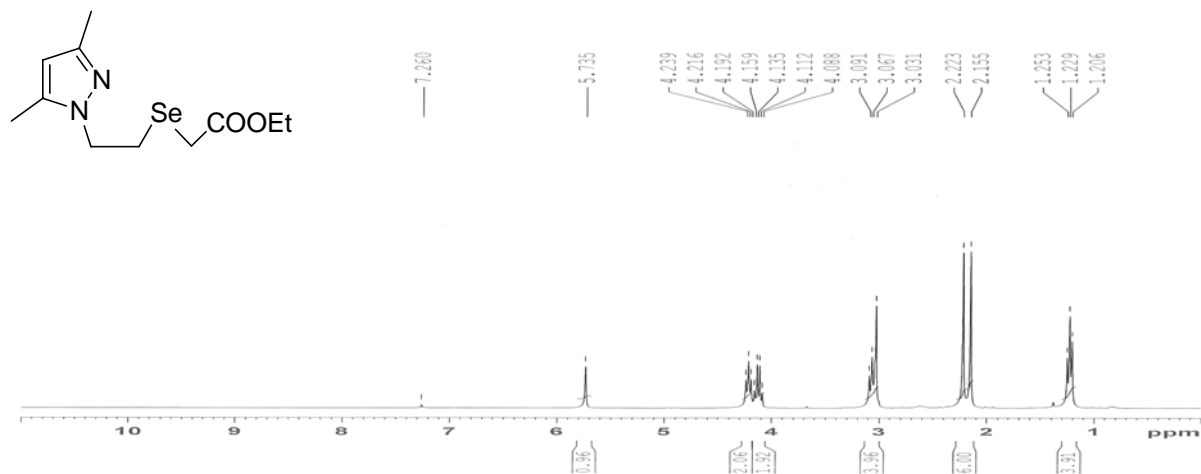

<sup>1</sup>H NMR (CDCl<sub>3</sub>) of dmpzCH<sub>2</sub>CH<sub>2</sub>SeCH<sub>2</sub>COOC<sub>2</sub>H<sub>5</sub>

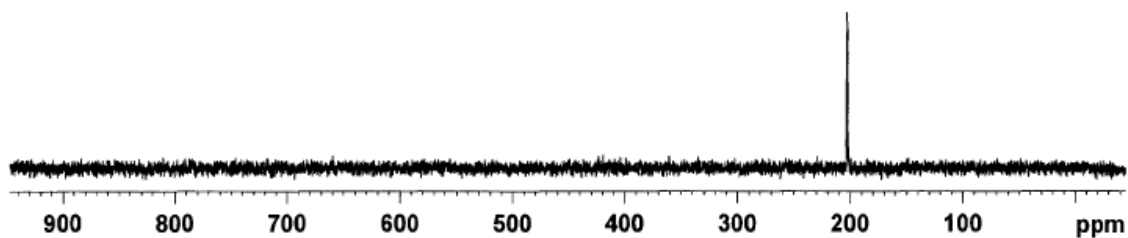

<sup>77</sup>Se {<sup>1</sup>H} NMR in CDCl<sub>3</sub> for dmpzCH<sub>2</sub>CH<sub>2</sub>SeCH<sub>2</sub>COOC<sub>2</sub>H<sub>5</sub>: δ 202.4 ppm

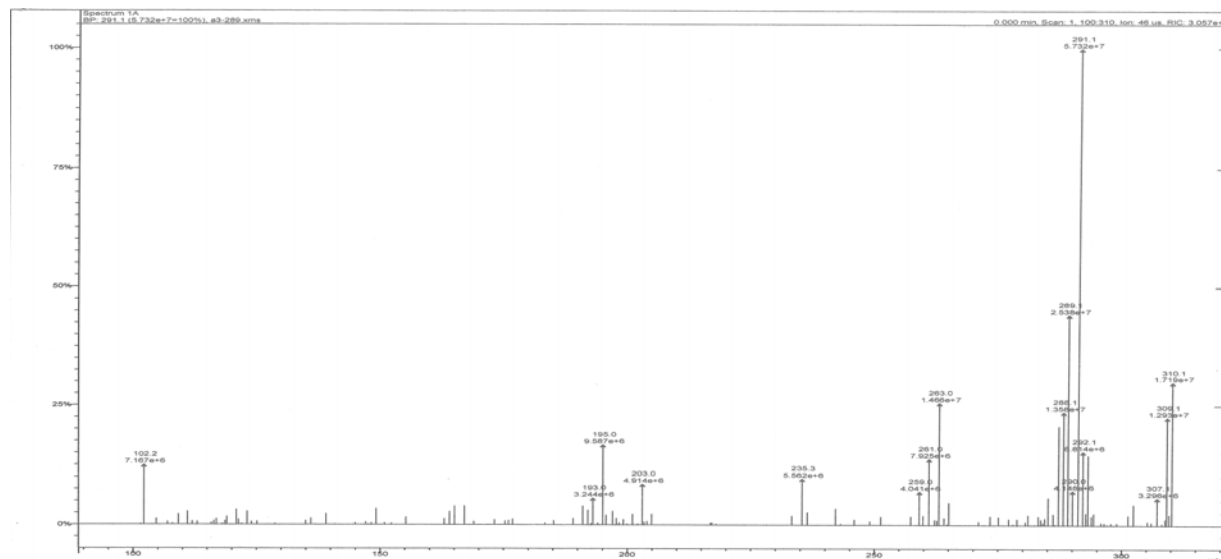

LC-MS of dmpzCH<sub>2</sub>CH<sub>2</sub>SeCH<sub>2</sub>COOC<sub>2</sub>H<sub>5</sub>

**dmpzCH<sub>2</sub>CH<sub>2</sub>SeCH<sub>2</sub>CH<sub>2</sub>COOCH<sub>2</sub>CH<sub>3</sub> (7):**

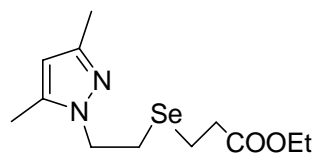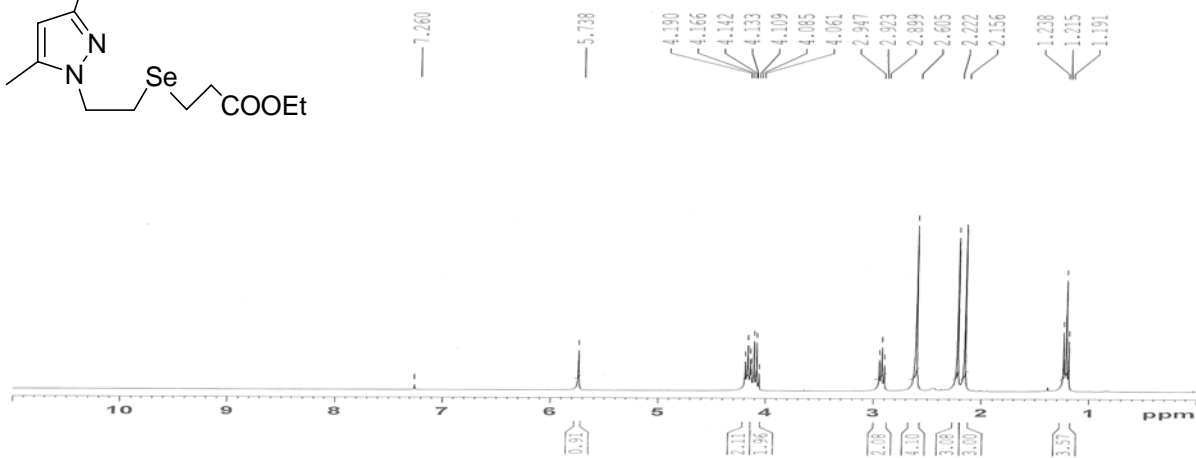

<sup>1</sup>H NMR (CDCl<sub>3</sub>) of dmpzCH<sub>2</sub>CH<sub>2</sub>SeCH<sub>2</sub>CH<sub>2</sub>COOC<sub>2</sub>H<sub>5</sub>

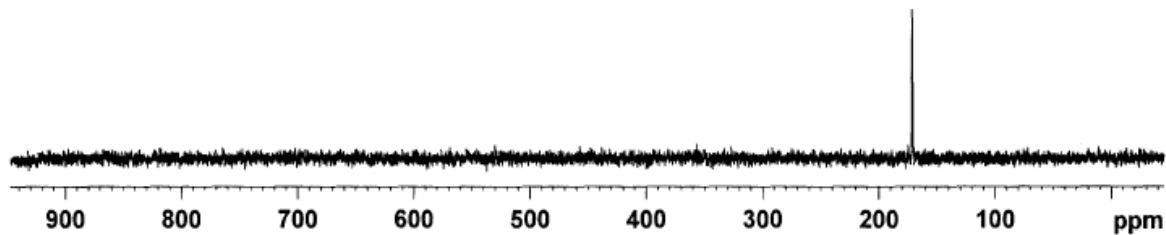

<sup>77</sup>Se{<sup>1</sup>H} NMR in CDCl<sub>3</sub> for dmpzCH<sub>2</sub>CH<sub>2</sub>SeCH<sub>2</sub>CH<sub>2</sub>COOC<sub>2</sub>H<sub>5</sub>: δ 171.1 ppm

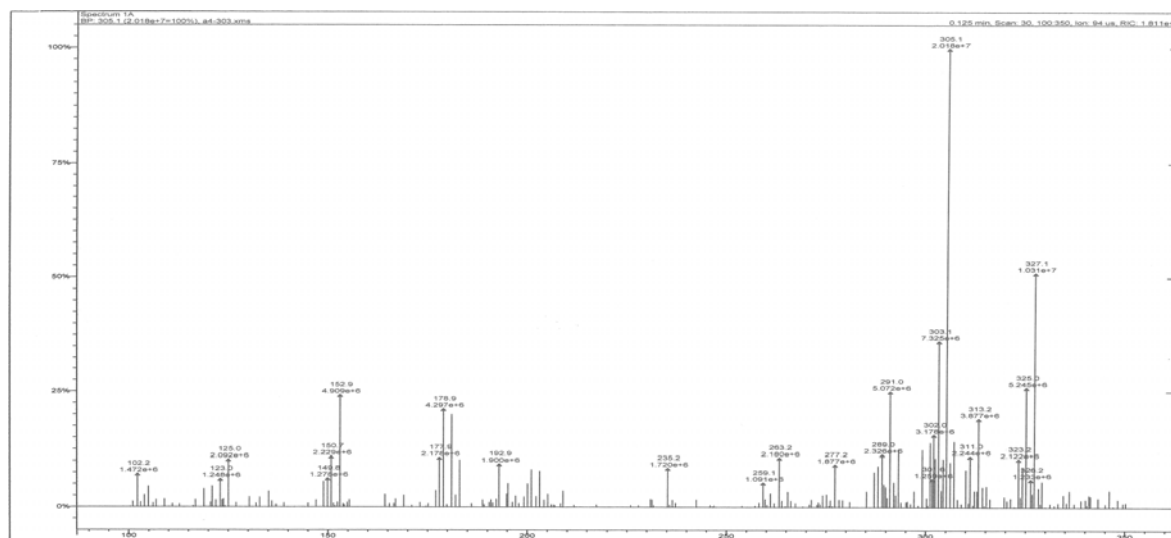

**dmpzCH<sub>2</sub>CH<sub>2</sub>SeCH<sub>2</sub>CH<sub>2</sub>CH<sub>2</sub>COOCH<sub>2</sub>CH<sub>3</sub> (8):**

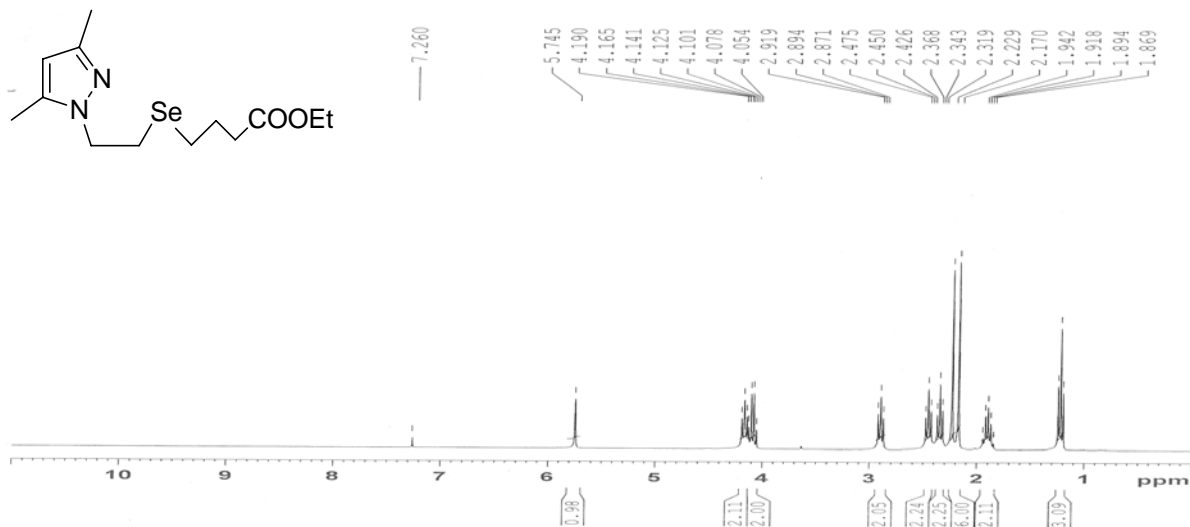

<sup>1</sup>H NMR (CDCl<sub>3</sub>) of dmpzCH<sub>2</sub>CH<sub>2</sub>SeCH<sub>2</sub>CH<sub>2</sub>CH<sub>2</sub>COOC<sub>2</sub>H<sub>5</sub>

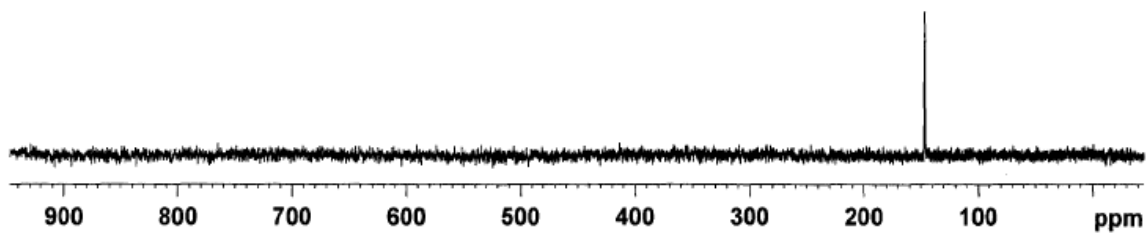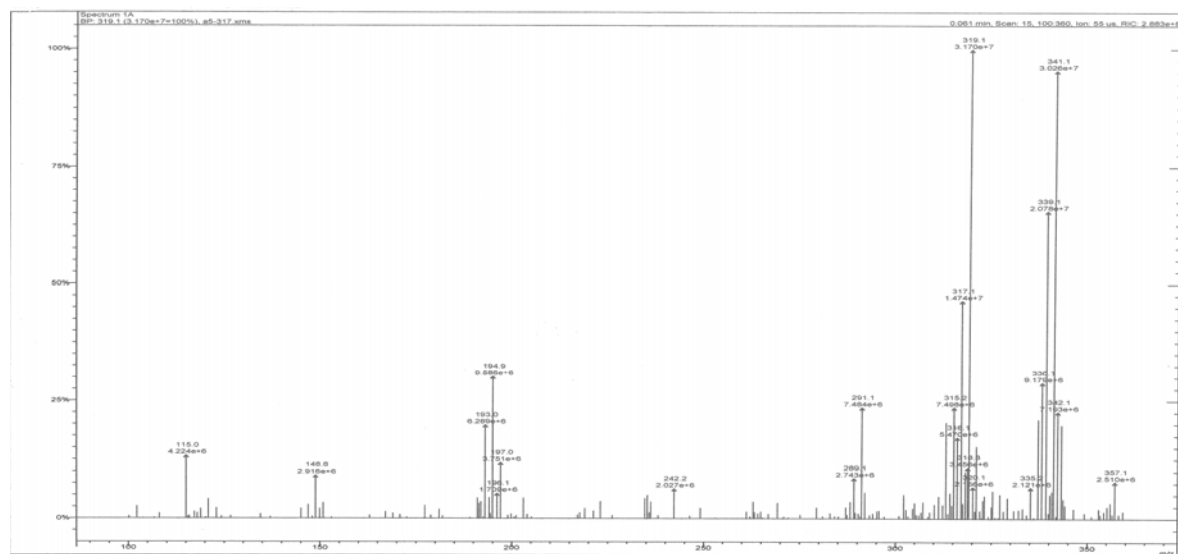

LC-MS of dmpzCH<sub>2</sub>CH<sub>2</sub>SeCH<sub>2</sub>CH<sub>2</sub>CH<sub>2</sub>COOC<sub>2</sub>H<sub>5</sub>



**dmpzCH<sub>2</sub>CH<sub>2</sub>SeCH<sub>2</sub>Ph (9):**

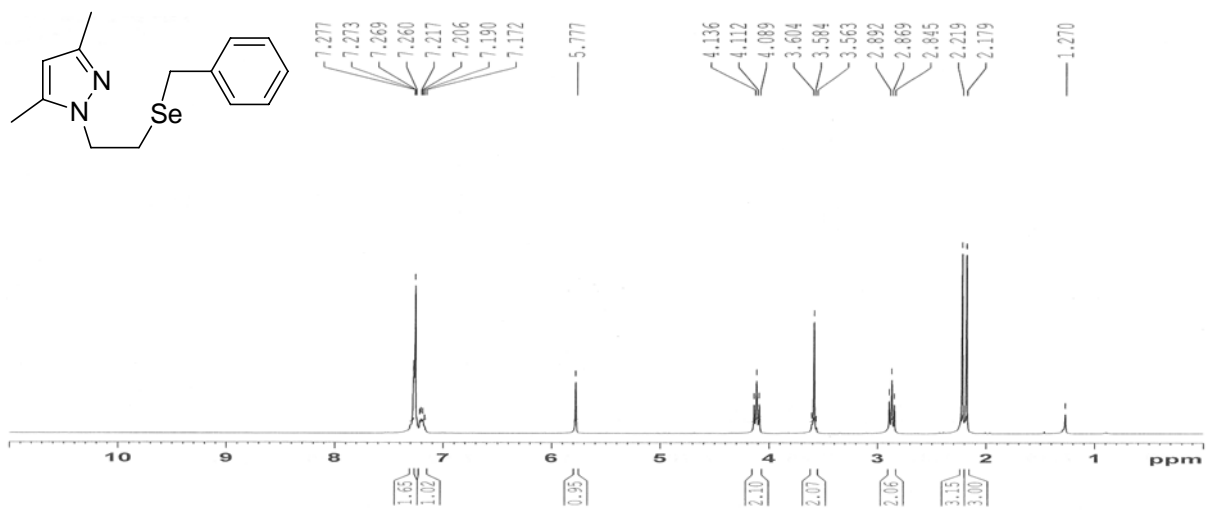

<sup>1</sup>H NMR (CDCl<sub>3</sub>) of dmpzCH<sub>2</sub>CH<sub>2</sub>SeCH<sub>2</sub>Ph

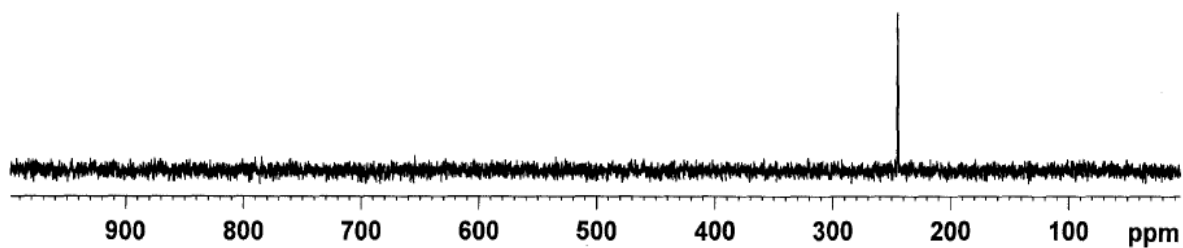

<sup>77</sup>Se{<sup>1</sup>H} NMR in CDCl<sub>3</sub> for dmpzCH<sub>2</sub>CH<sub>2</sub>SeCH<sub>2</sub>Ph: δ 244.6 ppm

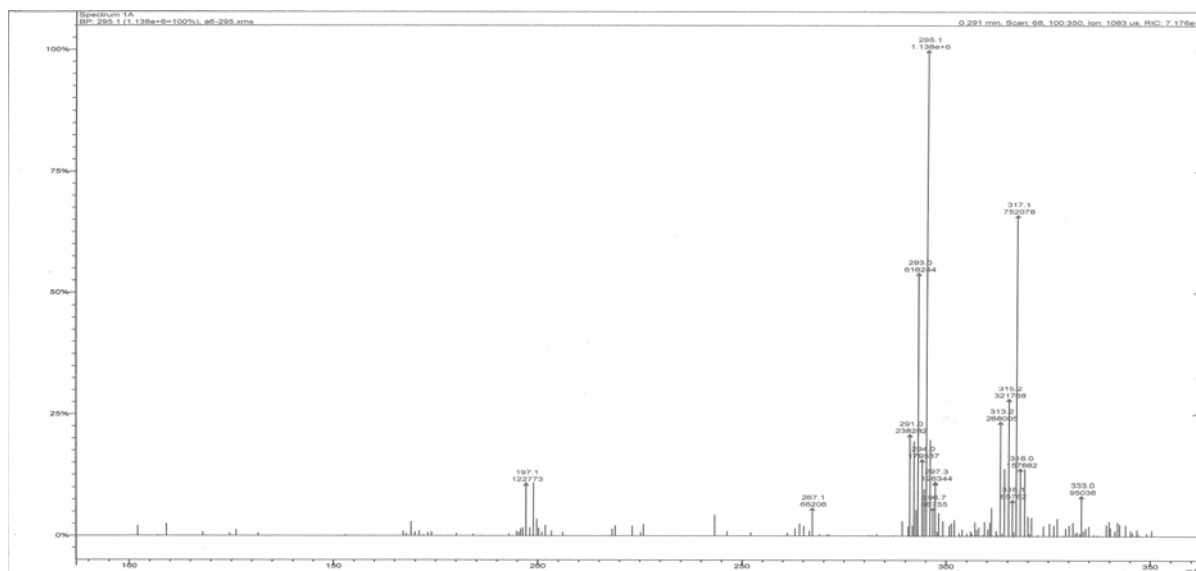

LC-MS of dmpzCH<sub>2</sub>CH<sub>2</sub>SeCH<sub>2</sub>Ph

**dmpzCH<sub>2</sub>CH<sub>2</sub>SeCH<sub>2</sub>CH=CH<sub>2</sub> (10):**

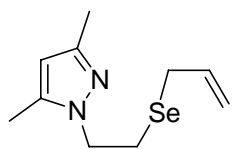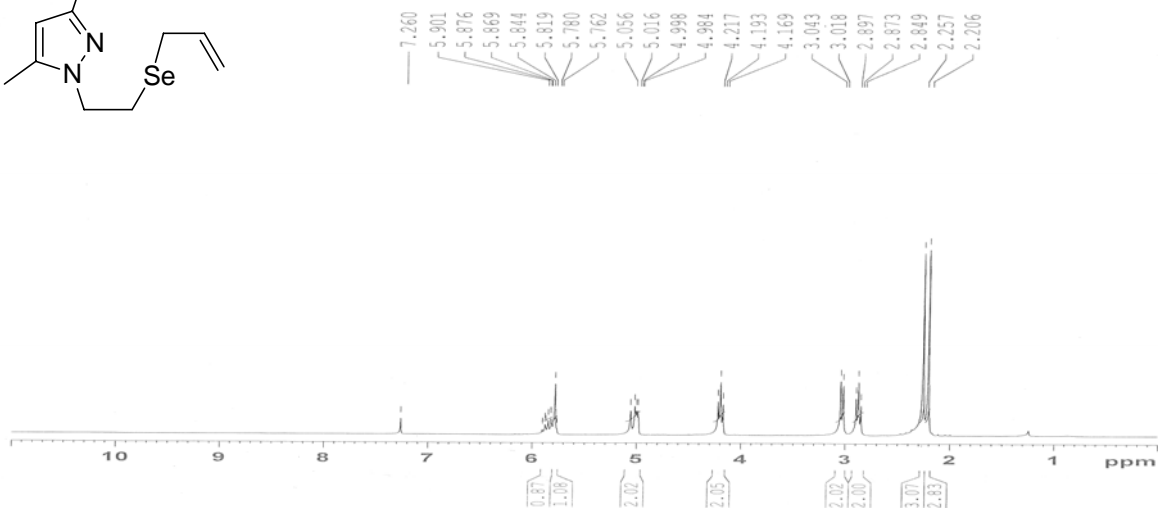

<sup>1</sup>H NMR (CDCl<sub>3</sub>) of dmpzCH<sub>2</sub>CH<sub>2</sub>SeCH<sub>2</sub>CH=CH<sub>2</sub>

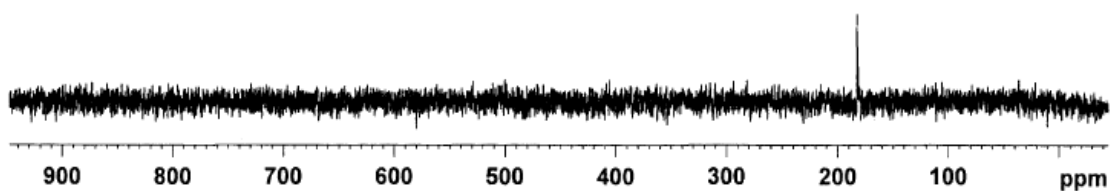

<sup>77</sup>Se{<sup>1</sup>H} NMR in CDCl<sub>3</sub> for dmpzCH<sub>2</sub>CH<sub>2</sub>SeCH<sub>2</sub>CH=CH<sub>2</sub>: δ 182.0 ppm

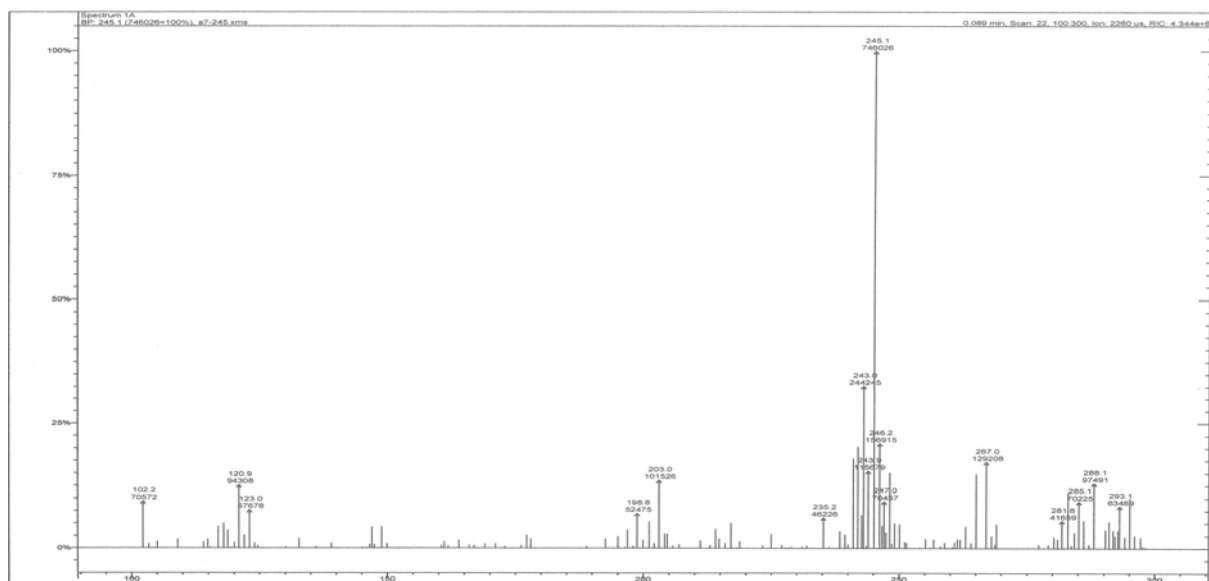

LC-MS of dmpzCH<sub>2</sub>CH<sub>2</sub>SeCH<sub>2</sub>CH=CH<sub>2</sub>

**dmpzCH<sub>2</sub>CH<sub>2</sub>SeCH<sub>2</sub>CH<sub>2</sub>NH<sub>2</sub> (11):**

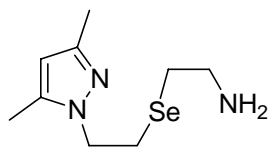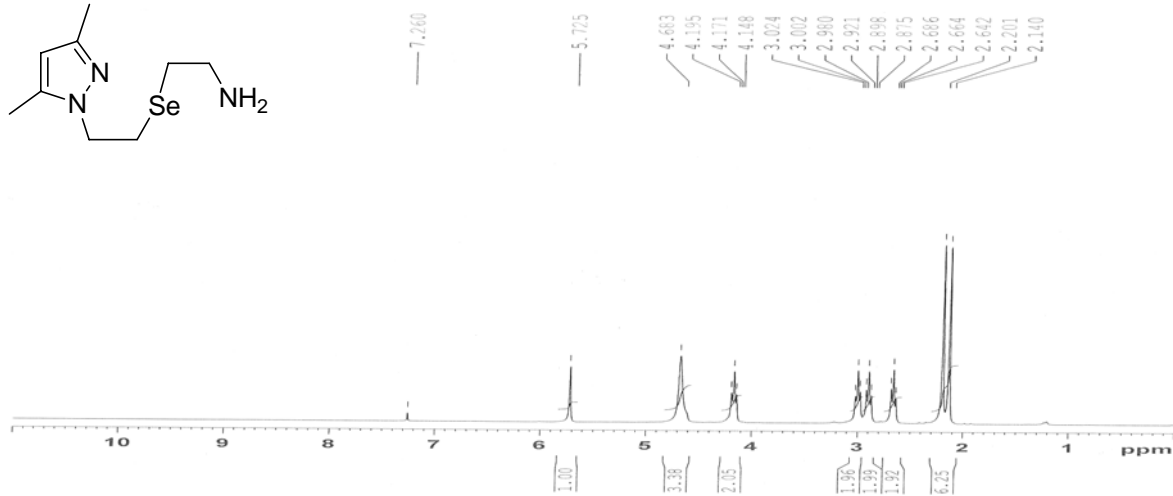

<sup>1</sup>H NMR (CDCl<sub>3</sub>) of dmpzCH<sub>2</sub>CH<sub>2</sub>SeCH<sub>2</sub>CH<sub>2</sub>NH<sub>2</sub>

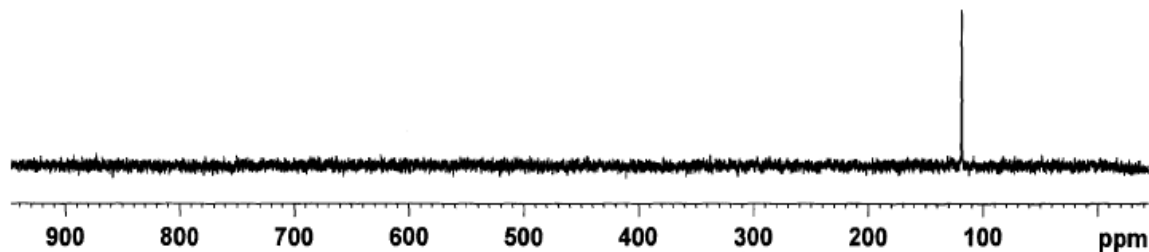

<sup>77</sup>Se{<sup>1</sup>H} NMR in CDCl<sub>3</sub> for dmpzCH<sub>2</sub>CH<sub>2</sub>SeCH<sub>2</sub>CH<sub>2</sub>NH<sub>2</sub>: δ 118.9 ppm

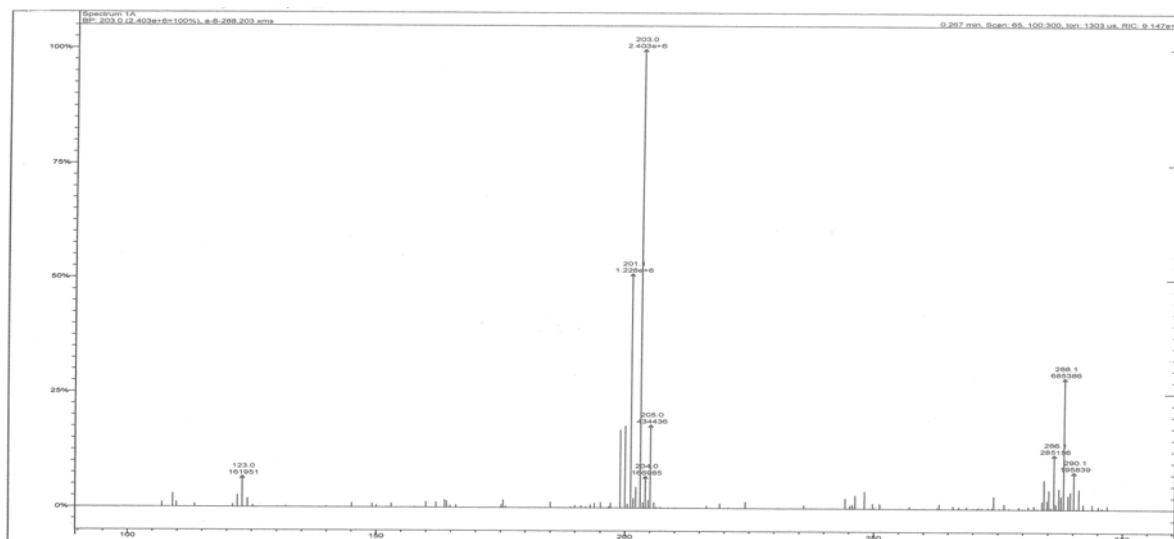

LC-MS of dmpzCH<sub>2</sub>CH<sub>2</sub>SeCH<sub>2</sub>CH<sub>2</sub>NH<sub>2</sub>

**dmpzCH<sub>2</sub>CH<sub>2</sub>SeCH<sub>2</sub>CH<sub>2</sub>NH<sub>2</sub> · 2HCl (12):**

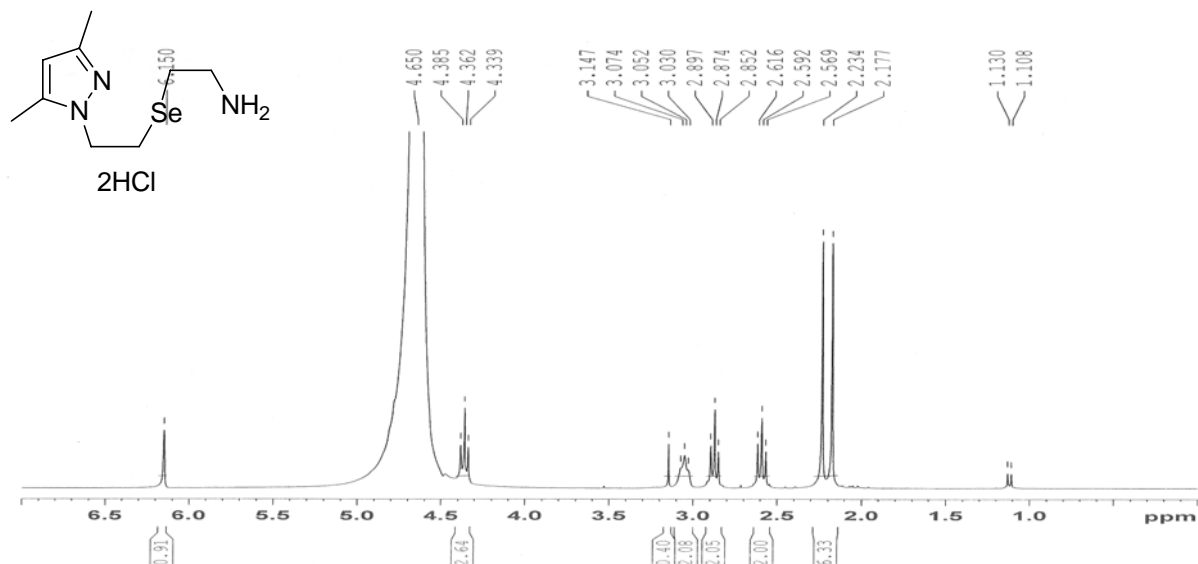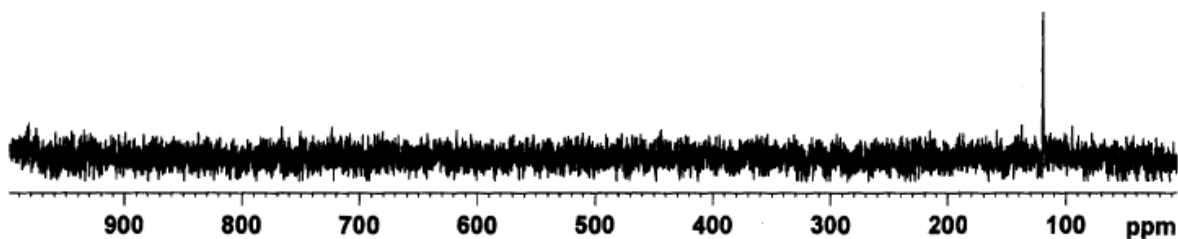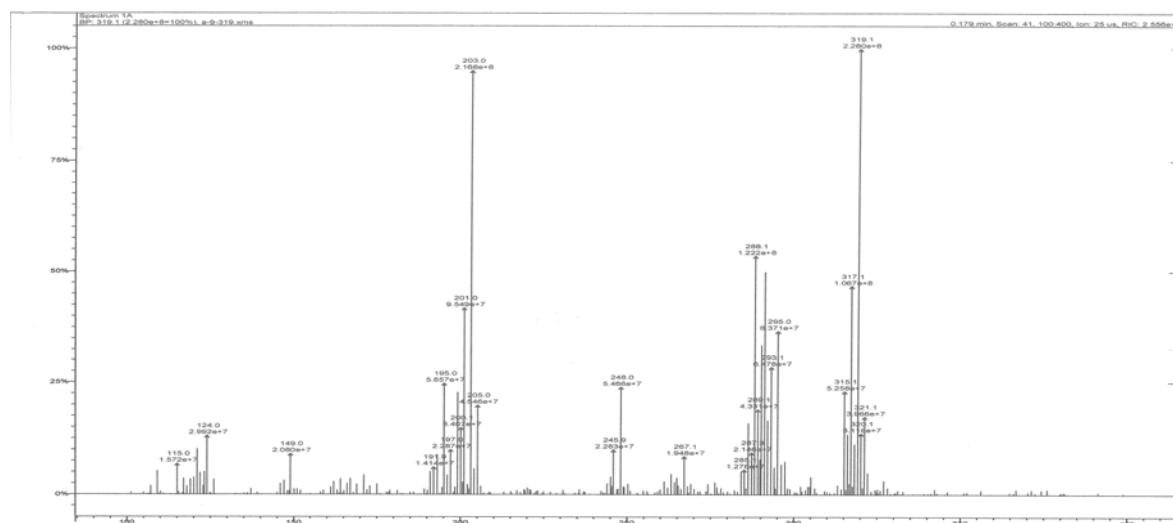

**dmpzCH<sub>2</sub>CH<sub>2</sub>SeC<sub>5</sub>H<sub>4</sub>N (13):**

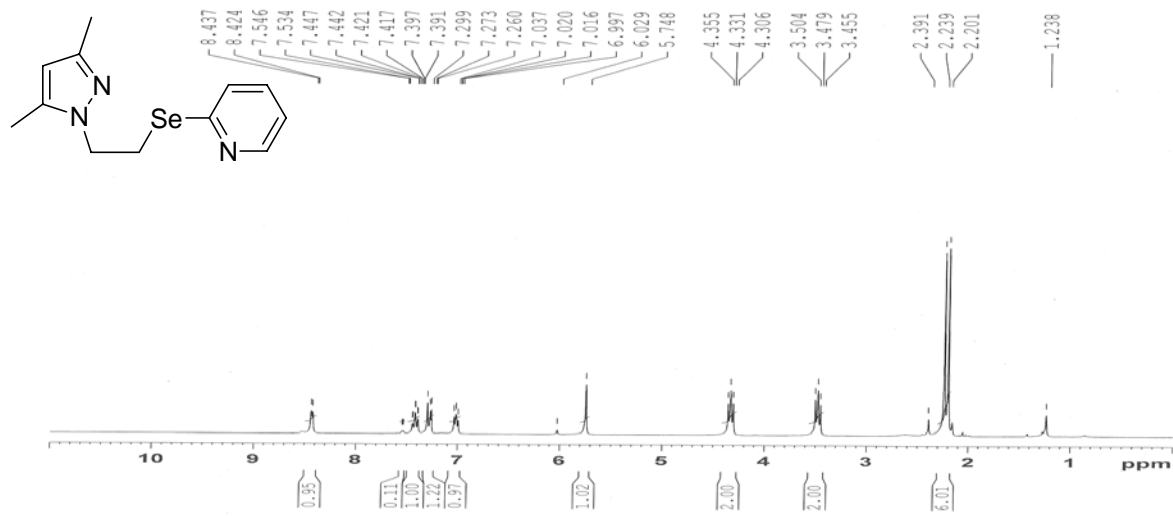

<sup>1</sup>H NMR (CDCl<sub>3</sub>) of dmpzCH<sub>2</sub>CH<sub>2</sub>SeC<sub>5</sub>H<sub>4</sub>N

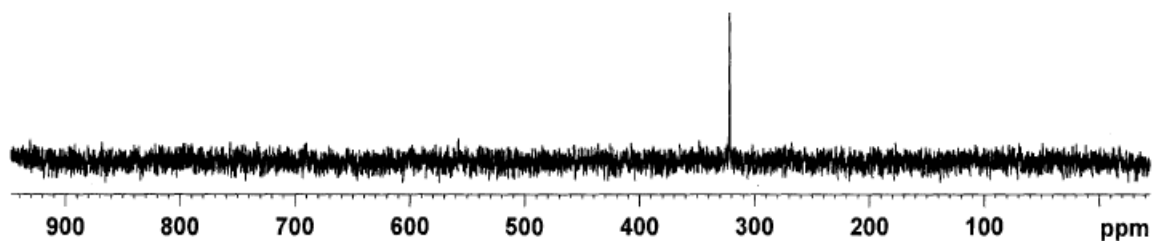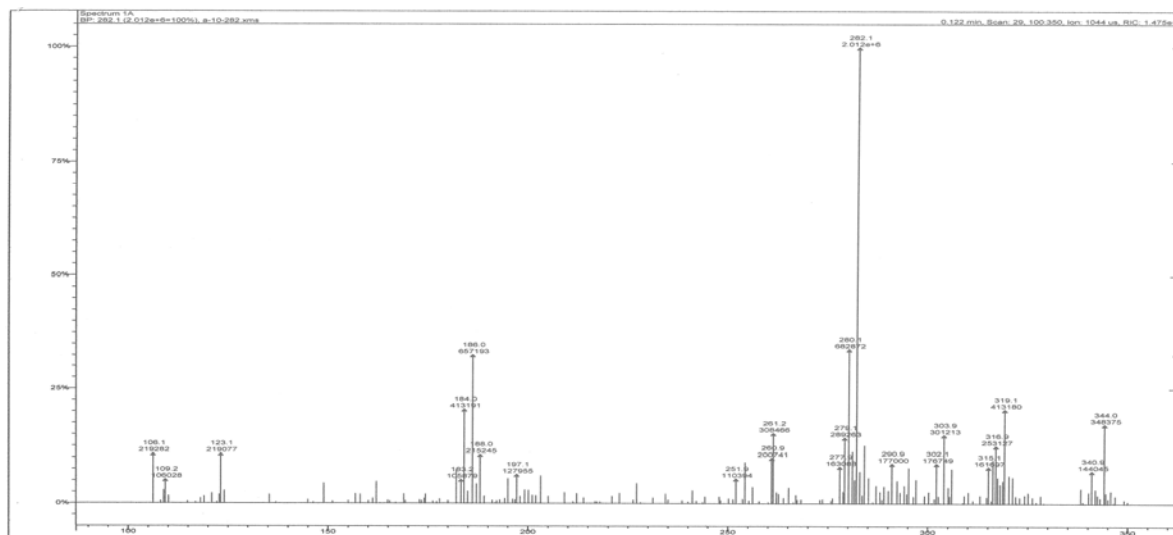

LC-MS of dmpzCH<sub>2</sub>CH<sub>2</sub>SeC<sub>5</sub>H<sub>4</sub>N

**dmpzCH<sub>2</sub>CH<sub>2</sub>SeCH<sub>2</sub>C<sub>6</sub>H<sub>4</sub>(*p*-OTs) (14):**

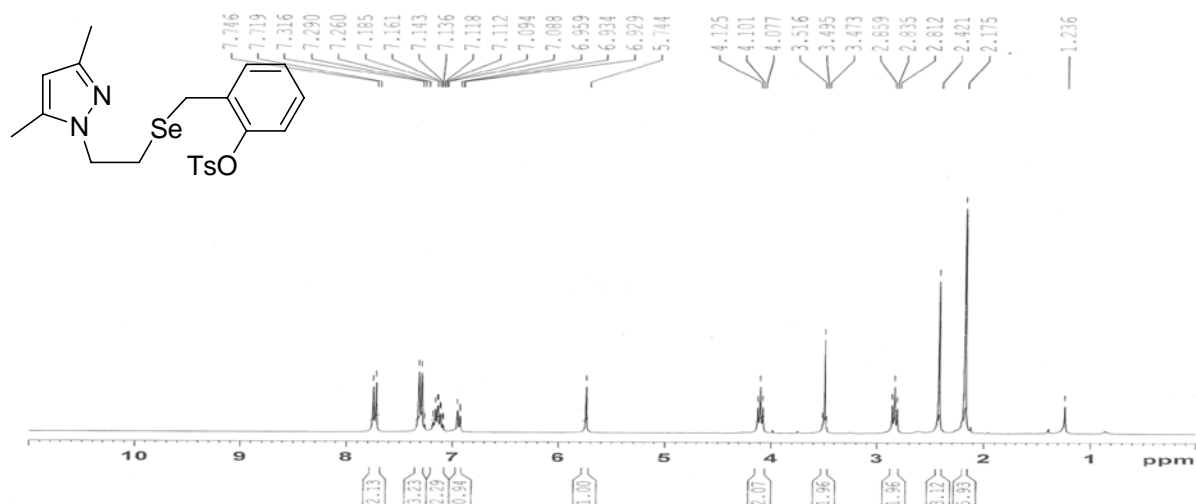

<sup>1</sup>H NMR (CDCl<sub>3</sub>) of dmpzCH<sub>2</sub>CH<sub>2</sub>SeCH<sub>2</sub>C<sub>6</sub>H<sub>4</sub>(*p*-OTs)

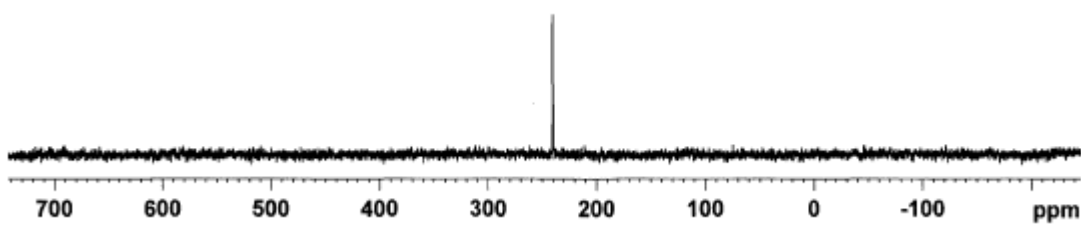

<sup>77</sup>Se{<sup>1</sup>H} NMR in CDCl<sub>3</sub> for dmpzCH<sub>2</sub>CH<sub>2</sub>SeCH<sub>2</sub>C<sub>6</sub>H<sub>4</sub>(*p*-OTs): δ 240.6 ppm

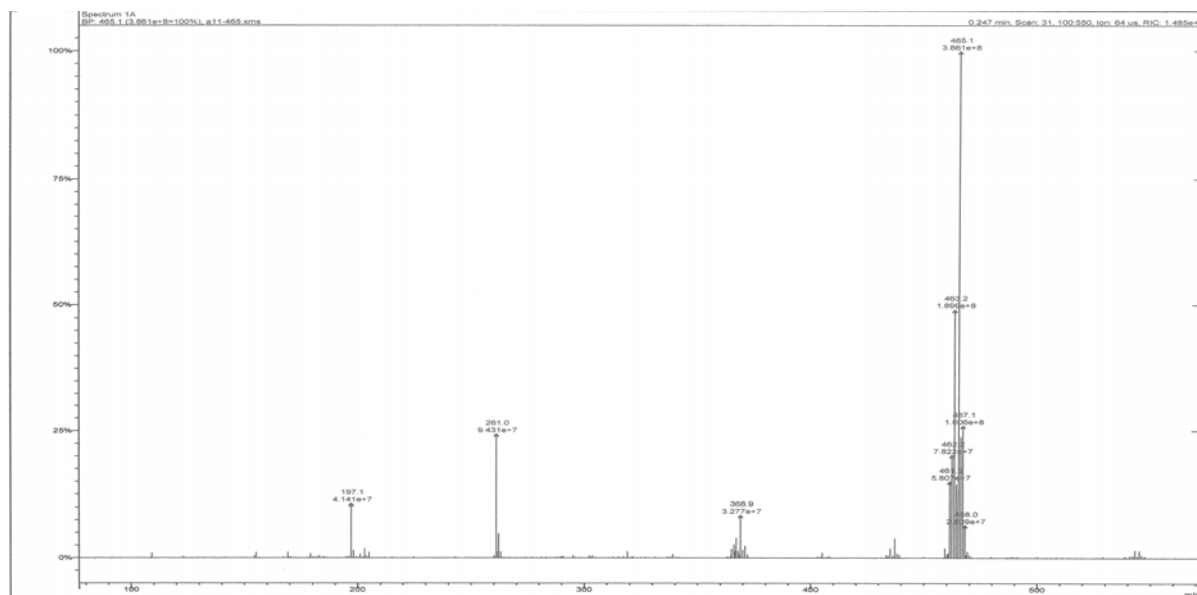

LC-MS of dmpzCH<sub>2</sub>CH<sub>2</sub>SeCH<sub>2</sub>C<sub>6</sub>H<sub>4</sub>(*p*-OTs)

**C<sub>6</sub>H<sub>4</sub>(*p*-OTs)CHO:**

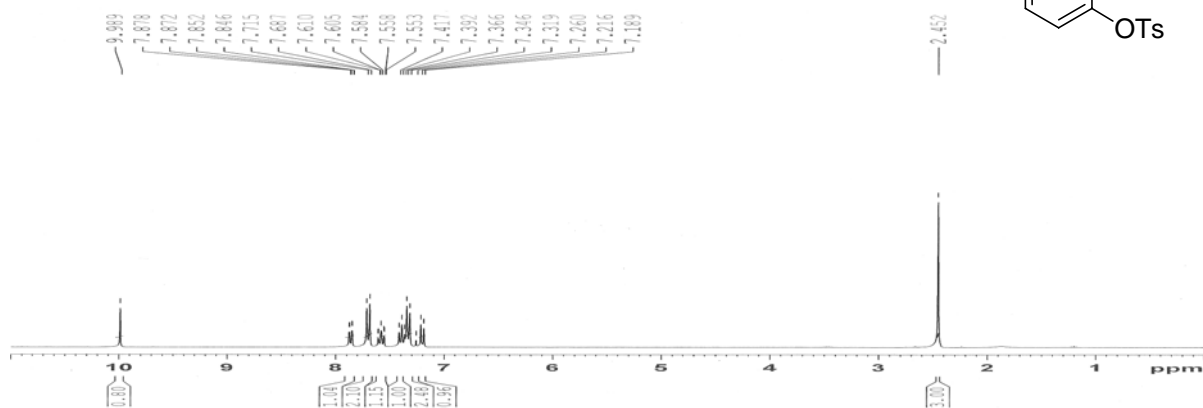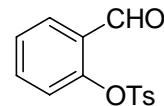

<sup>1</sup>H NMR (CDCl<sub>3</sub>) of C<sub>6</sub>H<sub>4</sub>(*p*-OTs)CHO

**C<sub>6</sub>H<sub>4</sub>(*p*-OTs)CH<sub>2</sub>OH:**

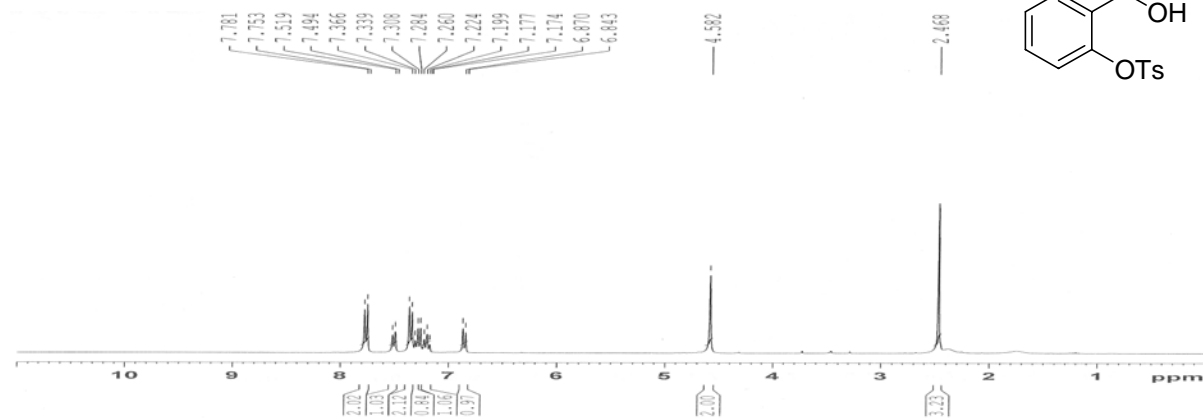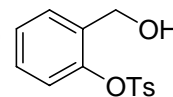

<sup>1</sup>H NMR (CDCl<sub>3</sub>) of C<sub>6</sub>H<sub>4</sub>(*p*-OTs)CH<sub>2</sub>OH

**C<sub>6</sub>H<sub>4</sub>(*p*-OTs)CH<sub>2</sub>Cl**

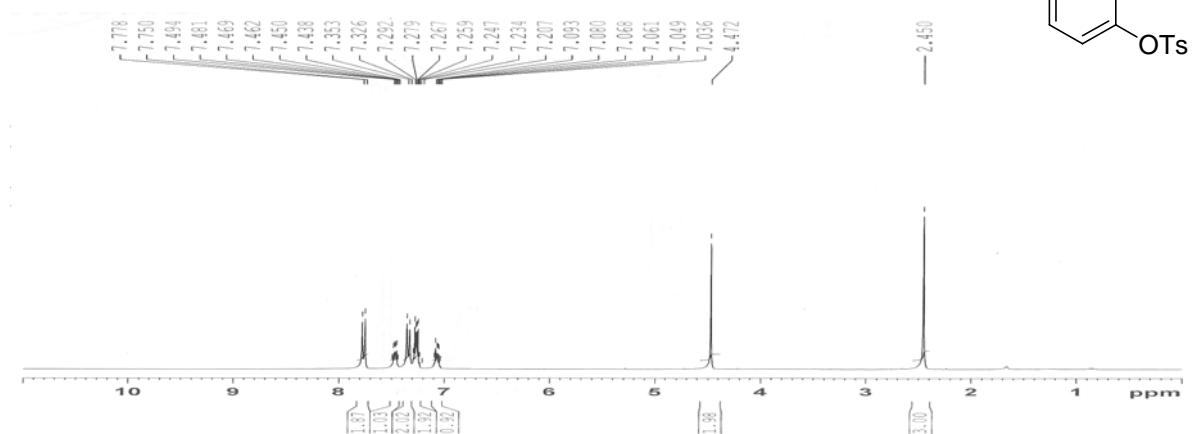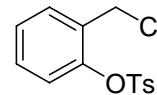

<sup>1</sup>H NMR (CDCl<sub>3</sub>) of C<sub>6</sub>H<sub>4</sub>(*p*-OTs)CH<sub>2</sub>Cl

## 4. Kinetic analysis data

### Catalytic properties of 2-(3,5-dimethylpyrazol-1-yl)ethylseleno derivatives as the probable mimics of Glutathione Peroxidase (GPx)

#### Reaction

Initially H<sub>2</sub>O<sub>2</sub> (aqueous solution) was standardized by titration with standardized KMnO<sub>4</sub> and the concentration of H<sub>2</sub>O<sub>2</sub> was found 47.6 % (w/w).

**A typical reaction mixture is obtained as given in equation below:**

DTT<sup>red</sup> (23.1 mg, 0.15 mmol) + 2-(3,5-dimethylpyrazol-1-yl)ethylseleno derivative as catalyst (0.015 mmol) + H<sub>2</sub>O<sub>2</sub> (9.15 μl from 47.6 % aqueous solution, 0.15 mmol)

Amounts of 2-(3,5-dimethylpyrazol-1-yl)ethylseleno derivatives used as catalyst for reaction are as given below

| Compound                                                                                    | No.  | Amount of catalyst (mg)<br>(mmol) |
|---------------------------------------------------------------------------------------------|------|-----------------------------------|
| (dmpzCH <sub>2</sub> CH <sub>2</sub> ) <sub>2</sub> Se                                      | (1)  | 4.9 mg (0.015 mmol)               |
| (dmpzCH <sub>2</sub> CH <sub>2</sub> Se) <sub>2</sub>                                       | (2)  | 6.0 mg (0.015 mmol)               |
| dmpzCH <sub>2</sub> SeCH <sub>2</sub> COOH                                                  | (3)  | 3.9 mg (0.015 mmol)               |
| dmpzCH <sub>2</sub> CH <sub>2</sub> SeCH <sub>2</sub> CH <sub>2</sub> COOH                  | (4)  | 4.1 mg (0.015 mmol)               |
| dmpzCH <sub>2</sub> CH <sub>2</sub> SeCH <sub>2</sub> CH <sub>2</sub> CH <sub>2</sub> COOH  | (5)  | 4.3 mg (0.015 mmol)               |
| dmpzCH <sub>2</sub> CH <sub>2</sub> SeCH <sub>2</sub> CH <sub>2</sub> NH <sub>2</sub>       | (11) | 3.7 mg (0.015 mmol)               |
|                                                                                             |      | 1.8 mg (0.0073 mmol)              |
|                                                                                             |      | 0.9 mg (0.00365 mmol)             |
|                                                                                             |      | 0.4 mg (0.0016 mmol)              |
| dmpzCH <sub>2</sub> CH <sub>2</sub> SeCH <sub>2</sub> CH <sub>2</sub> NH <sub>2</sub> ·2HCl | (12) | 4.2 mg (0.015 mmol)               |
| dmpzCH <sub>2</sub> CH <sub>2</sub> SePy                                                    | (13) | 4.2 mg (0.015 mmol)               |



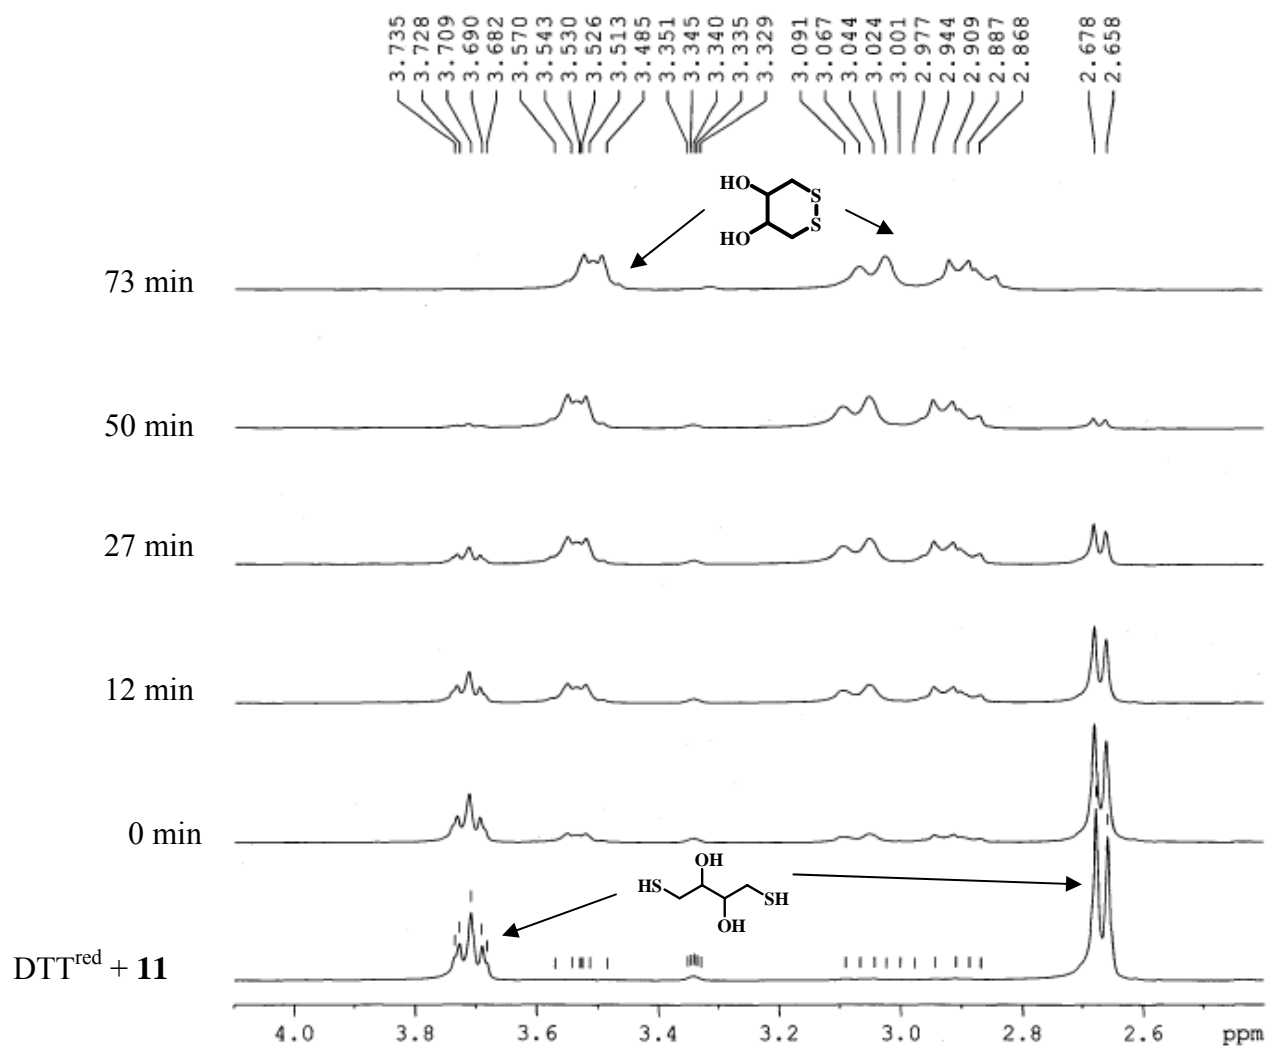

**Figure 1.** A series of <sup>1</sup>H NMR spectra obtained during the oxidation of DTT<sup>red</sup> (0.15 mmol) with H<sub>2</sub>O<sub>2</sub> (0.15 mmol) in the presence of a catalytic amount of **11** (0.0016 mmol) in CD<sub>3</sub>OD (0.5 ml) at 25°C.

### Effect of concentration of $\text{dmpzCH}_2\text{CH}_2\text{SeCH}_2\text{CH}_2\text{NH}_2$ (**11**)

A typical reaction mixture is obtained as given in equation below:

$\text{DTT}^{\text{red}}$  (23.1 mg, 0.15 mmol) + **11** (x mmol) +  $\text{H}_2\text{O}_2$  (9.15  $\mu\text{l}$  from 47.6 % aqueous solution, 0.15 mmol)

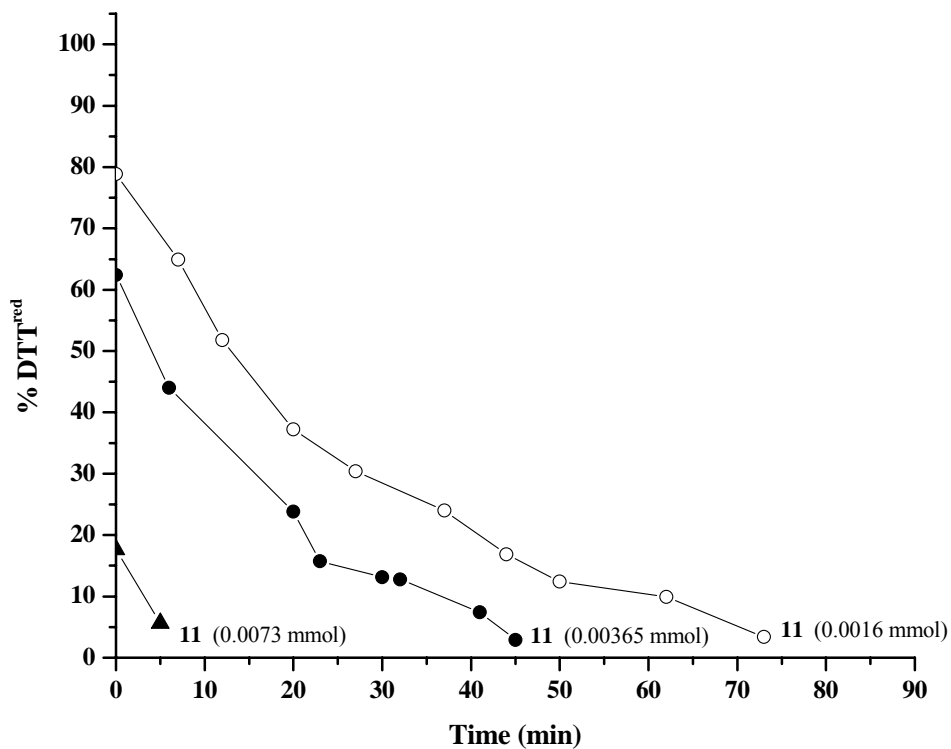

## Effect of concentration of H<sub>2</sub>O<sub>2</sub>

A typical reaction mixture is obtained as given in equation below:

DTT<sup>red</sup> (23.1 mg, 0.15 mmol) + dmpzCH<sub>2</sub>CH<sub>2</sub>SeCH<sub>2</sub>CH<sub>2</sub>NH<sub>2</sub> (3.7 mg, 0.015 mmol) + H<sub>2</sub>O<sub>2</sub> (x mmol)

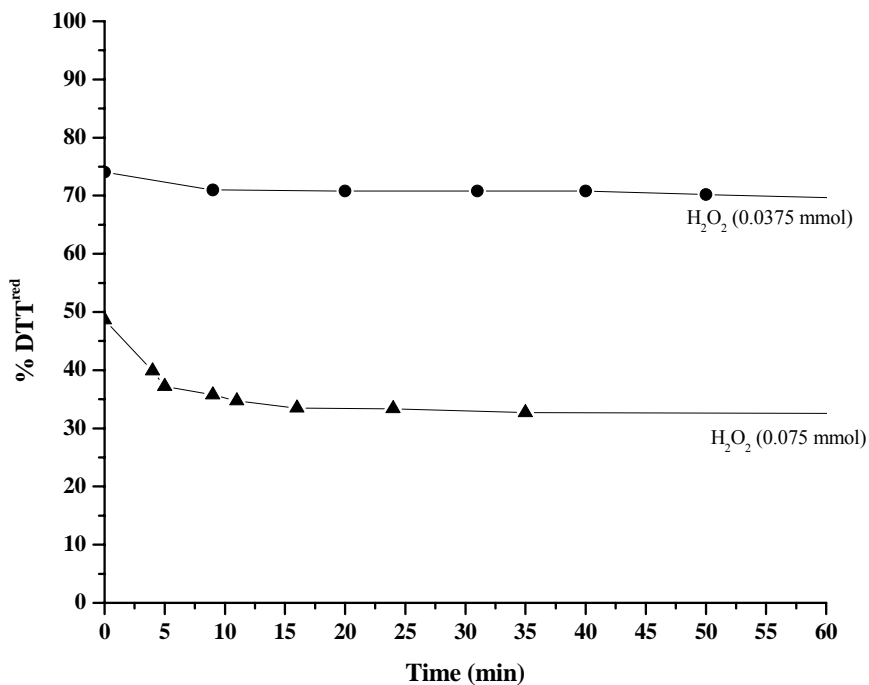

## Effect of basic condition

A typical reaction mixture is obtained as given in equation below:

(1) DTT<sup>red</sup> (23.1 mg, 0.15 mmol) + dmpzCH<sub>2</sub>CH<sub>2</sub>SeCH<sub>2</sub>CH<sub>2</sub>NH<sub>2</sub> (**11**) (0.9 mg, 0.00365 mmol) + H<sub>2</sub>O<sub>2</sub> (9.15 μl from 47.6 % aqueous solution, 0.15 mmol) and

(2) DTT<sup>red</sup> (23.1 mg, 0.15 mmol) + Et<sub>3</sub>N (x mmol) + H<sub>2</sub>O<sub>2</sub> (9.15 μl from 47.6 % aqueous solution, 0.15 mmol)

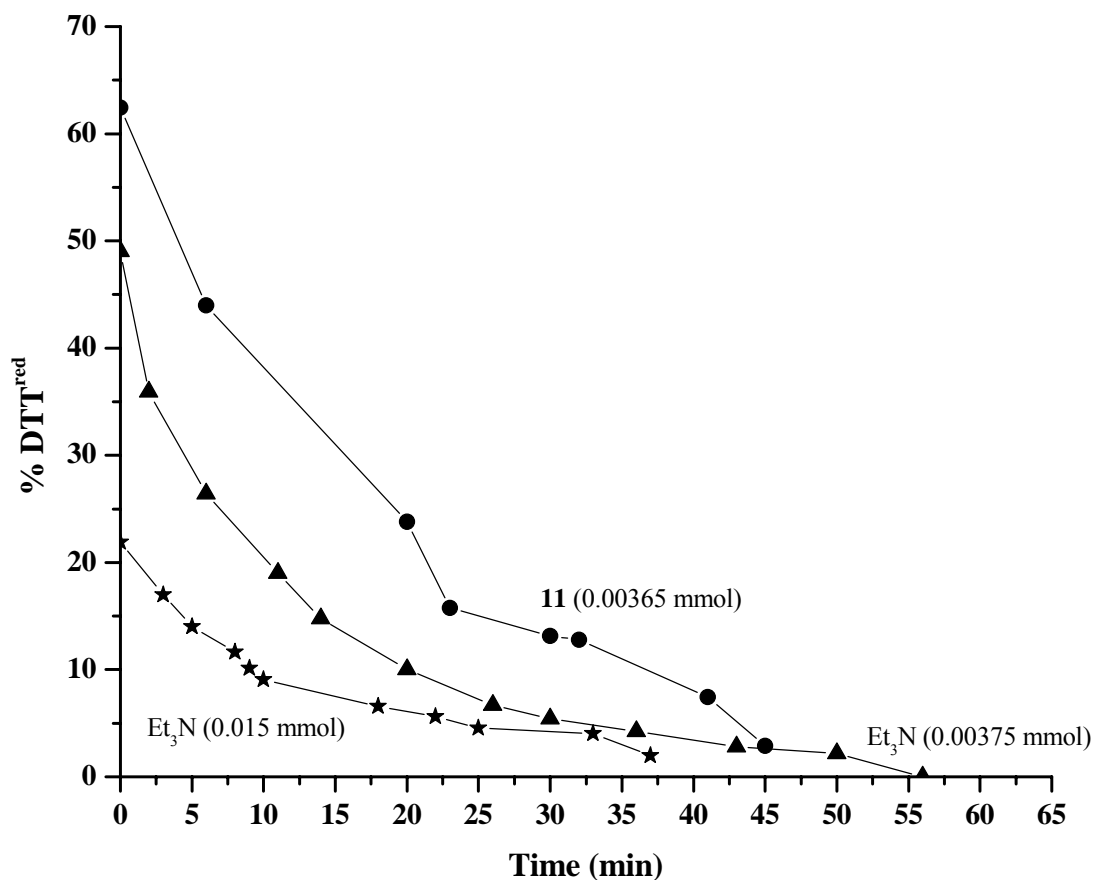

Crystal Information for **dmpzCH<sub>2</sub>CH<sub>2</sub>SeCH<sub>2</sub>COOH (3)**

data\_AH-06

```
_audit_creation_method          SHELXL-97
_chemical_name_systematic
;
?
;
_chemical_name_common           ?
_chemical_melting_point         ?
_chemical_formula_moiety        'C9 H14 N2 O2 Se'
_chemical_formula_sum           'C9 H14 N2 O2 Se'
_chemical_formula_weight        261.18
```

```
loop_
  _atom_type_symbol
  _atom_type_description
  _atom_type_scatter_dispersion_real
  _atom_type_scatter_dispersion_imag
  _atom_type_scatter_source
  'C'  'C'    0.0033  0.0016
  'International Tables Vol C Tables 4.2.6.8 and 6.1.1.4'
  'H'  'H'    0.0000  0.0000
  'International Tables Vol C Tables 4.2.6.8 and 6.1.1.4'
  'N'  'N'    0.0061  0.0033
  'International Tables Vol C Tables 4.2.6.8 and 6.1.1.4'
  'O'  'O'    0.0106  0.0060
  'International Tables Vol C Tables 4.2.6.8 and 6.1.1.4'
  'Se' 'Se'   -0.0929  2.2259
  'International Tables Vol C Tables 4.2.6.8 and 6.1.1.4'
```

```
_symmetry_cell_setting          orthorhombic
_symmetry_space_group_name_H-M  'P n a 21'
_symmetry_space_group_name_Hall 'P 2c -2n'
_symmetry_Int_Tables_number     33
```

```
loop_
  _symmetry_equiv_pos_as_xyz
  'x, y, z'
  '-x, -y, z+1/2'
  '-x+1/2, y+1/2, z+1/2'
  'x+1/2, -y+1/2, z'
```

```
_cell_length_a                  8.370(3)
_cell_length_b                  11.000(4)
_cell_length_c                  12.192(3)
_cell_angle_alpha               90.00
_cell_angle_beta                90.00
_cell_angle_gamma               90.00
_cell_volume                    1122.4(7)
```

```
_cell_formula_units_Z          4
_cell_measurement_temperature    298(2)
_cell_measurement_reflns_used    25
_cell_measurement_theta_min      3.3
_cell_measurement_theta_max      8.3

_exptl_crystal_description      'block'
_exptl_crystal_colour           'colorless'
_exptl_crystal_size_max         0.20
_exptl_crystal_size_mid         0.10
_exptl_crystal_size_min         0.05
_exptl_crystal_density_meas     ?
_exptl_crystal_density_diffrn   1.546
_exptl_crystal_density_method   'not measured'
_exptl_crystal_F_000            528
_exptl_absorpt_coefficient_mu    3.324
_exptl_absorpt_correction_type   psi-scan
_exptl_absorpt_process_details  '(North, Phillips & Mathews, 1968)'
_exptl_absorpt_correction_T_min  0.5561
_exptl_absorpt_correction_T_max  0.8514

_exptl_special_details
;
?
;

_diffrn_ambient_temperature     298(2)
_diffrn_radiation_wavelength    0.71069
_diffrn_radiation_type          MoK\alpha
_diffrn_radiation_source        'fine-focus sealed tube'
_diffrn_radiation_monochromator  graphite
_diffrn_measurement_device_type  'Rigaku AFC7S'
_diffrn_measurement_method      '\w-2\q'
_diffrn_detector_area_resol_mean ?
_diffrn_standards_number        3
_diffrn_standards_interval_count 0
_diffrn_standards_decay_%       1.74
_diffrn_reflns_number           1950
_diffrn_reflns_av_R_equivalents 0.0500
_diffrn_reflns_av_sigmaI/netI   0.0760
_diffrn_reflns_limit_h_min      -10
_diffrn_reflns_limit_h_max      6
_diffrn_reflns_limit_k_min      -8
_diffrn_reflns_limit_k_max      14
_diffrn_reflns_limit_l_min      0
_diffrn_reflns_limit_l_max      15
_diffrn_reflns_theta_min        3.06
_diffrn_reflns_theta_max        27.47
_reflns_number_total            1343
_reflns_number_gt               788
_reflns_threshold_expression     >2sigma(I)

_computing_data_collection      'WinAFC'
```

```
_computing_cell_refinement          'WinAFC'  
_computing_data_reduction           'CrystalStructure'  
_computing_structure_solution       'SIR92'  
_computing_structure_refinement     'SHELXL-97 (Sheldrick, 1997)'  
_computing_molecular_graphics       'ortep 3 for windows'  
_computing_publication_material     'WinGX 1.70.01'  
  
_refine_special_details  
;  
Refinement of F2 against ALL reflections. The weighted R-factor wR and  
goodness of fit S are based on F2, conventional R-factors R are based  
on F, with F set to zero for negative F2. The threshold expression of  
F2 > 2sigma(F2) is used only for calculating R-factors(gt) etc. and  
is  
not relevant to the choice of reflections for refinement. R-factors  
based  
on F2 are statistically about twice as large as those based on F, and  
R-  
factors based on ALL data will be even larger.  
;  
  
_refine_ls_structure_factor_coef    Fsqd  
_refine_ls_matrix_type              full  
_refine_ls_weighting_scheme         calc  
_refine_ls_weighting_details  
'calc w=1/[\s2(Fo2)+(0.0531P)2+0.0000P] where P=(Fo2+2Fc2)/3'  
_atom_sites_solution_primary        direct  
_atom_sites_solution_secondary      difmap  
_atom_sites_solution_hydrogens      geom  
_refine_ls_hydrogen_treatment       constr  
_refine_ls_extinction_method         none  
_refine_ls_extinction_coef          ?  
_refine_ls_abs_structure_details  
'Flack H D (1983), Acta Cryst. A39, 876-881'  
_refine_ls_abs_structure_Flack       -0.02(3)  
_refine_ls_number_reflns             1343  
_refine_ls_number_parameters         130  
_refine_ls_number_restraints         1  
_refine_ls_R_factor_all              0.1054  
_refine_ls_R_factor_gt               0.0400  
_refine_ls_wR_factor_ref             0.1178  
_refine_ls_wR_factor_gt              0.0965  
_refine_ls_goodness_of_fit_ref       0.984  
_refine_ls_restrained_S_all          0.983  
_refine_ls_shift/su_max              0.000  
_refine_ls_shift/su_mean             0.000  
  
loop_  
_atom_site_label  
_atom_site_type_symbol  
_atom_site_fract_x  
_atom_site_fract_y  
_atom_site_fract_z  
_atom_site_U_iso_or_equiv
```

\_atom\_site\_adp\_type  
\_atom\_site\_occupancy  
\_atom\_site\_symmetry\_multiplicity  
\_atom\_site\_calc\_flag  
\_atom\_site\_refinement\_flags  
\_atom\_site\_disorder\_assembly  
\_atom\_site\_disorder\_group  
Se1 Se 0.55362(9) 0.11992(7) 0.70268(14) 0.0514(3) Uani 1 1 d . . .  
C2 C 0.6720(8) -0.1236(5) 0.7129(14) 0.0393(18) Uani 1 1 d . . .  
H2A H 0.7026 -0.1104 0.6371 0.047 Uiso 1 1 calc R . .  
H2B H 0.7586 -0.0948 0.7589 0.047 Uiso 1 1 calc R . .  
C5 C 0.5898(9) -0.4380(7) 0.6947(14) 0.043(2) Uani 1 1 d . . .  
N1 N 0.6509(7) -0.2545(6) 0.7312(5) 0.0434(18) Uani 1 1 d . . .  
C4 C 0.6255(10) -0.4341(9) 0.8046(7) 0.045(2) Uani 1 1 d . . .  
H4 H 0.6246 -0.4990 0.8535 0.054 Uiso 1 1 calc R . .  
N2 N 0.6029(9) -0.3275(8) 0.6479(6) 0.0453(18) Uani 1 1 d . . .  
C1 C 0.5277(9) -0.0516(7) 0.7367(7) 0.045(2) Uani 1 1 d . . .  
H1A H 0.5011 -0.0602 0.8137 0.053 Uiso 1 1 calc R . .  
H1B H 0.4391 -0.0838 0.6943 0.053 Uiso 1 1 calc R . .  
C3 C 0.6627(9) -0.3156(8) 0.8279(7) 0.042(2) Uani 1 1 d . . .  
C7 C 0.5489(12) -0.5453(8) 0.6237(9) 0.065(3) Uani 1 1 d . . .  
H7A H 0.5033 -0.5173 0.5561 0.098 Uiso 1 1 calc R . .  
H7B H 0.4733 -0.5961 0.6612 0.098 Uiso 1 1 calc R . .  
H7C H 0.6441 -0.5910 0.6086 0.098 Uiso 1 1 calc R . .  
C6 C 0.7178(11) -0.2528(8) 0.9302(8) 0.064(3) Uani 1 1 d . . .  
H6A H 0.8232 -0.2207 0.9189 0.097 Uiso 1 1 calc R . .  
H6B H 0.7197 -0.3099 0.9897 0.097 Uiso 1 1 calc R . .  
H6C H 0.6458 -0.1876 0.9474 0.097 Uiso 1 1 calc R . .  
C9 C 0.5916(11) 0.1695(9) 0.9307(8) 0.053(2) Uani 1 1 d . . .  
C8 C 0.6866(10) 0.1642(8) 0.8284(8) 0.054(2) Uani 1 1 d . . .  
H8A H 0.7716 0.1049 0.8367 0.065 Uiso 1 1 calc R . .  
H8B H 0.7354 0.2429 0.8152 0.065 Uiso 1 1 calc R . .  
O2 O 0.5478(8) 0.2817(5) 0.9572(5) 0.0632(18) Uani 1 1 d . . .  
H2 H 0.4984 0.2804 1.0153 0.095 Uiso 1 1 calc R . .  
O1 O 0.5559(10) 0.0798(7) 0.9821(6) 0.083(3) Uani 1 1 d . . .

loop\_

\_atom\_site\_aniso\_label  
\_atom\_site\_aniso\_U\_11  
\_atom\_site\_aniso\_U\_22  
\_atom\_site\_aniso\_U\_33  
\_atom\_site\_aniso\_U\_23  
\_atom\_site\_aniso\_U\_13  
\_atom\_site\_aniso\_U\_12  
Se1 0.0732(6) 0.0410(4) 0.0400(4) 0.0032(8) 0.0048(8) 0.0039(5)  
C2 0.046(4) 0.033(3) 0.040(5) -0.004(5) 0.010(6) -0.005(3)  
C5 0.037(4) 0.033(4) 0.059(7) 0.003(6) 0.002(6) 0.005(3)  
N1 0.043(4) 0.036(3) 0.051(5) -0.006(3) 0.008(3) 0.006(4)  
C4 0.043(5) 0.048(5) 0.045(5) 0.006(4) 0.010(4) 0.005(5)  
N2 0.046(4) 0.051(5) 0.039(4) -0.002(4) -0.003(4) 0.006(4)  
C1 0.044(4) 0.047(5) 0.043(5) -0.002(4) 0.008(4) -0.006(4)  
C3 0.041(5) 0.047(6) 0.038(5) 0.000(4) 0.006(4) 0.003(5)  
C7 0.079(7) 0.041(5) 0.076(7) -0.016(5) 0.009(6) 0.001(5)  
C6 0.078(7) 0.075(6) 0.040(4) 0.010(5) -0.010(5) -0.010(5)



C9 0.069(7) 0.051(5) 0.039(5) -0.006(5) 0.001(5) -0.007(5)  
C8 0.059(6) 0.042(5) 0.060(6) -0.011(5) 0.005(5) -0.004(5)  
O2 0.097(5) 0.044(4) 0.049(4) -0.002(3) 0.019(4) 0.002(4)  
O1 0.155(9) 0.044(3) 0.051(4) -0.005(3) 0.024(5) -0.010(5)

\_geom\_special\_details

;

All esds (except the esd in the dihedral angle between two l.s. planes) are estimated using the full covariance matrix. The cell esds are taken into account individually in the estimation of esds in distances, angles and torsion angles; correlations between esds in cell parameters are only used when they are defined by crystal symmetry. An approximate (isotropic)

treatment of cell esds is used for estimating esds involving l.s. planes.

;

loop\_

\_geom\_bond\_atom\_site\_label\_1  
\_geom\_bond\_atom\_site\_label\_2  
\_geom\_bond\_distance  
\_geom\_bond\_site\_symmetry\_2  
\_geom\_bond\_publ\_flag

Se1 C1 1.944(8) . ?

Se1 C8 1.956(9) . ?

C2 N1 1.468(8) . ?

C2 C1 1.473(9) . ?

C2 H2A 0.9700 . ?

C2 H2B 0.9700 . ?

C5 N2 1.347(12) . ?

C5 C4 1.373(18) . ?

C5 C7 1.503(15) . ?

N1 N2 1.356(9) . ?

N1 C3 1.361(10) . ?

C4 C3 1.370(13) . ?

C4 H4 0.9300 . ?

C1 H1A 0.9700 . ?

C1 H1B 0.9700 . ?

C3 C6 1.498(12) . ?

C7 H7A 0.9600 . ?

C7 H7B 0.9600 . ?

C7 H7C 0.9600 . ?

C6 H6A 0.9600 . ?

C6 H6B 0.9600 . ?

C6 H6C 0.9600 . ?

C9 O1 1.206(12) . ?

C9 O2 1.328(11) . ?

C9 C8 1.480(12) . ?

C8 H8A 0.9700 . ?

C8 H8B 0.9700 . ?

O2 H2 0.8200 . ?

loop\_

\_geom\_angle\_atom\_site\_label\_1

\_geom\_angle\_atom\_site\_label\_2

\_geom\_angle\_atom\_site\_label\_3  
\_geom\_angle  
\_geom\_angle\_site\_symmetry\_1  
\_geom\_angle\_site\_symmetry\_3  
\_geom\_angle\_publ\_flag  
C1 Se1 C8 98.0(4) . . ?  
N1 C2 C1 113.5(6) . . ?  
N1 C2 H2A 108.9 . . ?  
C1 C2 H2A 108.9 . . ?  
N1 C2 H2B 108.9 . . ?  
C1 C2 H2B 108.9 . . ?  
H2A C2 H2B 107.7 . . ?  
N2 C5 C4 111.6(10) . . ?  
N2 C5 C7 118.9(13) . . ?  
C4 C5 C7 129.5(10) . . ?  
N2 N1 C3 112.2(7) . . ?  
N2 N1 C2 120.2(9) . . ?  
C3 N1 C2 127.4(9) . . ?  
C3 C4 C5 106.4(9) . . ?  
C3 C4 H4 126.8 . . ?  
C5 C4 H4 126.8 . . ?  
C5 N2 N1 103.9(9) . . ?  
C2 C1 Se1 112.9(5) . . ?  
C2 C1 H1A 109.0 . . ?  
Se1 C1 H1A 109.0 . . ?  
C2 C1 H1B 109.0 . . ?  
Se1 C1 H1B 109.0 . . ?  
H1A C1 H1B 107.8 . . ?  
N1 C3 C4 105.9(7) . . ?  
N1 C3 C6 121.0(8) . . ?  
C4 C3 C6 133.0(8) . . ?  
C5 C7 H7A 109.5 . . ?  
C5 C7 H7B 109.5 . . ?  
H7A C7 H7B 109.5 . . ?  
C5 C7 H7C 109.5 . . ?  
H7A C7 H7C 109.5 . . ?  
H7B C7 H7C 109.5 . . ?  
C3 C6 H6A 109.5 . . ?  
C3 C6 H6B 109.5 . . ?  
H6A C6 H6B 109.5 . . ?  
C3 C6 H6C 109.5 . . ?  
H6A C6 H6C 109.5 . . ?  
H6B C6 H6C 109.5 . . ?  
O1 C9 O2 124.4(9) . . ?  
O1 C9 C8 122.7(9) . . ?  
O2 C9 C8 112.9(9) . . ?  
C9 C8 Se1 111.3(6) . . ?  
C9 C8 H8A 109.4 . . ?  
Se1 C8 H8A 109.4 . . ?  
C9 C8 H8B 109.4 . . ?  
Se1 C8 H8B 109.4 . . ?  
H8A C8 H8B 108.0 . . ?  
C9 O2 H2 109.5 . . ?

```
loop_
  _geom_torsion_atom_site_label_1
  _geom_torsion_atom_site_label_2
  _geom_torsion_atom_site_label_3
  _geom_torsion_atom_site_label_4
  _geom_torsion
  _geom_torsion_site_symmetry_1
  _geom_torsion_site_symmetry_2
  _geom_torsion_site_symmetry_3
  _geom_torsion_site_symmetry_4
  _geom_torsion_publ_flag
C1 C2 N1 N2 91.6(13) . . . . ?
C1 C2 N1 C3 -83.1(13) . . . . ?
N2 C5 C4 C3 0.1(10) . . . . ?
C7 C5 C4 C3 176.6(8) . . . . ?
C4 C5 N2 N1 1.1(9) . . . . ?
C7 C5 N2 N1 -175.8(7) . . . . ?
C3 N1 N2 C5 -1.9(9) . . . . ?
C2 N1 N2 C5 -177.4(6) . . . . ?
N1 C2 C1 Se1 -176.2(8) . . . . ?
C8 Se1 C1 C2 -75.2(9) . . . . ?
N2 N1 C3 C4 2.0(9) . . . . ?
C2 N1 C3 C4 177.0(7) . . . . ?
N2 N1 C3 C6 178.5(7) . . . . ?
C2 N1 C3 C6 -6.5(12) . . . . ?
C5 C4 C3 N1 -1.2(9) . . . . ?
C5 C4 C3 C6 -177.1(9) . . . . ?
O1 C9 C8 Se1 80.2(11) . . . . ?
O2 C9 C8 Se1 -98.3(8) . . . . ?
C1 Se1 C8 C9 -74.1(7) . . . . ?

_diffrn_measured_fraction_theta_max    0.999
_diffrn_reflns_theta_full              27.47
_diffrn_measured_fraction_theta_full   0.999
_refine_diff_density_max                0.447
_refine_diff_density_min               -0.371
_refine_diff_density_rms                0.086
```

Crystal Information for **dmpzCH<sub>2</sub>CH<sub>2</sub>SeCH<sub>2</sub>CH<sub>2</sub>COOH (4)**

data\_AH-07

```
_audit_creation_method          SHELXL-97
_chemical_name_systematic
;
?
;
_chemical_name_common           ?
_chemical_melting_point         ?
_chemical_formula_moiety        ?
_chemical_formula_sum           'C10 H16 N2 O2 Se'
_chemical_formula_weight        275.21

loop_
  _atom_type_symbol
  _atom_type_description
  _atom_type_scatter_dispersion_real
  _atom_type_scatter_dispersion_imag
  _atom_type_scatter_source
  'C'  'C'    0.0033  0.0016
  'International Tables Vol C Tables 4.2.6.8 and 6.1.1.4'
  'H'  'H'    0.0000  0.0000
  'International Tables Vol C Tables 4.2.6.8 and 6.1.1.4'
  'O'  'O'    0.0106  0.0060
  'International Tables Vol C Tables 4.2.6.8 and 6.1.1.4'
  'N'  'N'    0.0061  0.0033
  'International Tables Vol C Tables 4.2.6.8 and 6.1.1.4'
  'Se' 'Se'   -0.0929  2.2259
  'International Tables Vol C Tables 4.2.6.8 and 6.1.1.4'

_symmetry_cell_setting          monoclinic
_symmetry_space_group_name_H-M  'P 1 21/n 1'
_symmetry_space_group_name_Hall '-P 2yn'
_symmetry_Int_Tables_number     14

loop_
  _symmetry_equiv_pos_as_xyz
  'x, y, z'
  '-x+1/2, y+1/2, -z+1/2'
  '-x, -y, -z'
  'x-1/2, -y-1/2, z-1/2'

_cell_length_a                  13.200(5)
_cell_length_b                  11.169(5)
_cell_length_c                  7.993(4)
_cell_angle_alpha               90.00
_cell_angle_beta                92.12(4)
_cell_angle_gamma               90.00
_cell_volume                    1177.5(9)
```

```
_cell_formula_units_Z          4
_cell_measurement_temperature    298(2)
_cell_measurement_reflns_used    25
_cell_measurement_theta_min      3.5
_cell_measurement_theta_max      10.5

_exptl_crystal_description      'block'
_exptl_crystal_colour           'colorless'
_exptl_crystal_size_max         0.20
_exptl_crystal_size_mid         0.15
_exptl_crystal_size_min         0.10
_exptl_crystal_density_meas     ?
_exptl_crystal_density_diffrn   1.552
_exptl_crystal_density_method   'not measured'
_exptl_crystal_F_000            560
_exptl_absorpt_coefficient_mu   3.172
_exptl_absorpt_correction_type   psi-scan
_exptl_absorpt_process_details   '(North, Phillips & Mathews, 1968)'
_exptl_absorpt_correction_T_min 0.5695
_exptl_absorpt_correction_T_max 0.7421

_exptl_special_details
;
?
;

_diffrn_ambient_temperature     298(2)
_diffrn_radiation_wavelength    0.71073
_diffrn_radiation_type          MoK\alpha
_diffrn_radiation_source        'fine-focus sealed tube'
_diffrn_radiation_monochromator  graphite
_diffrn_measurement_device_type  'Rigaku AFC7S'
_diffrn_measurement_method      '\w-2\q'
_diffrn_detector_area_resol_mean ?
_diffrn_standards_number        3
_diffrn_standards_interval_count 150
_diffrn_standards_decay_%       -0.23
_diffrn_reflns_number           3241
_diffrn_reflns_av_R_equivalents 0.0199
_diffrn_reflns_av_sigmaI/netI   0.0675
_diffrn_reflns_limit_h_min      -9
_diffrn_reflns_limit_h_max      17
_diffrn_reflns_limit_k_min      0
_diffrn_reflns_limit_k_max      14
_diffrn_reflns_limit_l_min      -10
_diffrn_reflns_limit_l_max      10
_diffrn_reflns_theta_min        2.93
_diffrn_reflns_theta_max        27.51
_reflns_number_total            2708
_reflns_number_gt               1595
_reflns_threshold_expression     >2sigma(I)

_computing_data_collection      'WinAFC'
```

```
_computing_cell_refinement          'WinAFC'  
_computing_data_reduction           'CrystalStructure'  
_computing_structure_solution       'SIR 2004'  
_computing_structure_refinement     'SHELXL-97 (Sheldrick, 1997)'  
_computing_molecular_graphics      'Ortep 3 for windows'  
_computing_publication_material     'WinGX 1.80.01'  
  
_refine_special_details  
;  
Refinement of F2 against ALL reflections. The weighted R-factor wR and  
goodness of fit S are based on F2, conventional R-factors R are based  
on F, with F set to zero for negative F2. The threshold expression of  
F2 > 2sigma(F2) is used only for calculating R-factors(gt) etc. and  
is  
not relevant to the choice of reflections for refinement. R-factors  
based  
on F2 are statistically about twice as large as those based on F, and  
R-  
factors based on ALL data will be even larger.  
;  
  
_refine_ls_structure_factor_coef    Fsqd  
_refine_ls_matrix_type              full  
_refine_ls_weighting_scheme         calc  
_refine_ls_weighting_details  
'calc w=1/[\s2(Fo2)+(0.0249P)2+1.4004P] where P=(Fo2+2Fc2)/3'  
_atom_sites_solution_primary        direct  
_atom_sites_solution_secondary      difmap  
_atom_sites_solution_hydrogens      geom  
_refine_ls_hydrogen_treatment       constr  
_refine_ls_extinction_method        SHELXL  
_refine_ls_extinction_coef          0.0026(6)  
_refine_ls_extinction_expression  
'Fc**=kFc[1+0.001xFc2\l3/sin(2\q)]-1/4'  
_refine_ls_number_reflns            2708  
_refine_ls_number_parameters         140  
_refine_ls_number_restraints        0  
_refine_ls_R_factor_all              0.1006  
_refine_ls_R_factor_gt              0.0372  
_refine_ls_wR_factor_ref            0.0977  
_refine_ls_wR_factor_gt             0.0775  
_refine_ls_goodness_of_fit_ref      1.000  
_refine_ls_restrained_S_all         1.000  
_refine_ls_shift/su_max              0.000  
_refine_ls_shift/su_mean            0.000  
  
loop_  
_atom_site_label  
_atom_site_type_symbol  
_atom_site_fract_x  
_atom_site_fract_y  
_atom_site_fract_z  
_atom_site_U_iso_or_equiv  
_atom_site_adp_type
```

```
_atom_site_occupancy
_atom_site_symmetry_multiplicity
_atom_site_calc_flag
_atom_site_refinement_flags
_atom_site_disorder_assembly
_atom_site_disorder_group
Se1 Se 0.03797(3) 0.85299(4) 0.11515(6) 0.04673(17) Uani 1 1 d . . .
O1 O 0.1407(3) 0.4479(3) 0.1374(5) 0.0732(11) Uani 1 1 d . . .
O2 O 0.2768(2) 0.4969(3) 0.0002(5) 0.0628(10) Uani 1 1 d . . .
H2 H 0.2852 0.4241 -0.0003 0.094 Uiso 1 1 calc R . .
N1 N -0.2796(2) 0.8407(3) 0.0357(4) 0.0380(8) Uani 1 1 d . . .
N2 N -0.3285(2) 0.7342(3) 0.0472(4) 0.0378(8) Uani 1 1 d . . .
C6 C -0.3042(3) 1.0603(4) 0.0728(7) 0.0595(13) Uani 1 1 d . . .
H6A H -0.2464 1.0705 0.1479 0.089 Uiso 1 1 calc R . .
H6B H -0.3579 1.1123 0.1058 0.089 Uiso 1 1 calc R . .
H6C H -0.2859 1.0796 -0.0391 0.089 Uiso 1 1 calc R . .
C8 C 0.0609(3) 0.6803(4) 0.1197(6) 0.0496(12) Uani 1 1 d . . .
H8A H 0.0509 0.6498 0.2315 0.060 Uiso 1 1 calc R . .
H8B H 0.0128 0.6410 0.0432 0.060 Uiso 1 1 calc R . .
C4 C -0.4301(3) 0.8844(4) 0.1180(6) 0.0433(10) Uani 1 1 d . . .
H4 H -0.4871 0.9253 0.1523 0.052 Uiso 1 1 calc R . .
C3 C -0.3392(3) 0.9338(4) 0.0788(5) 0.0396(10) Uani 1 1 d . . .
C5 C -0.4212(3) 0.7616(4) 0.0968(5) 0.0369(9) Uani 1 1 d . . .
C9 C 0.1678(3) 0.6540(4) 0.0689(6) 0.0456(10) Uani 1 1 d . . .
H9A H 0.1768 0.6843 -0.0434 0.055 Uiso 1 1 calc R . .
H9B H 0.2152 0.6957 0.1440 0.055 Uiso 1 1 calc R . .
C2 C -0.1721(3) 0.8432(4) -0.0012(5) 0.0398(9) Uani 1 1 d . . .
H2A H -0.1588 0.9115 -0.0720 0.048 Uiso 1 1 calc R . .
H2B H -0.1551 0.7713 -0.0622 0.048 Uiso 1 1 calc R . .
C1 C -0.1063(3) 0.8509(4) 0.1559(5) 0.0456(10) Uani 1 1 d . . .
H1A H -0.1208 0.7831 0.2269 0.055 Uiso 1 1 calc R . .
H1B H -0.1236 0.9231 0.2160 0.055 Uiso 1 1 calc R . .
C10 C 0.1916(3) 0.5222(4) 0.0727(6) 0.0433(10) Uani 1 1 d . . .
C7 C -0.4984(3) 0.6652(4) 0.1163(6) 0.0523(12) Uani 1 1 d . . .
H7A H -0.4848 0.6005 0.0414 0.078 Uiso 1 1 calc R . .
H7B H -0.5648 0.6968 0.0904 0.078 Uiso 1 1 calc R . .
H7C H -0.4953 0.6365 0.2295 0.078 Uiso 1 1 calc R . .
```

```
loop_
_atom_site_aniso_label
_atom_site_aniso_U_11
_atom_site_aniso_U_22
_atom_site_aniso_U_33
_atom_site_aniso_U_23
_atom_site_aniso_U_13
_atom_site_aniso_U_12
Se1 0.0340(2) 0.0354(2) 0.0709(3) -0.0010(3) 0.00317(18) 0.0018(2)
O1 0.071(2) 0.0385(17) 0.113(3) 0.004(2) 0.048(2) -0.0012(17)
O2 0.0512(19) 0.0359(16) 0.104(3) 0.0097(18) 0.0321(18) 0.0111(15)
N1 0.0304(16) 0.0315(17) 0.053(2) -0.0025(17) 0.0070(14) 0.0008(14)
N2 0.0337(18) 0.0301(16) 0.050(2) -0.0020(16) 0.0052(15) -0.0005(14)
C6 0.051(3) 0.032(2) 0.095(4) -0.006(3) -0.005(3) 0.006(2)
C8 0.046(3) 0.032(2) 0.071(3) -0.001(2) 0.010(2) 0.0055(18)
C4 0.033(2) 0.044(2) 0.054(3) -0.005(2) 0.0067(19) 0.0089(17)
```

C3 0.038(2) 0.034(2) 0.047(3) -0.0045(19) 0.0002(19) 0.0037(18)  
C5 0.034(2) 0.039(2) 0.038(2) 0.0011(19) 0.0040(18) 0.0001(17)  
C9 0.044(2) 0.036(2) 0.058(3) -0.001(2) 0.008(2) 0.001(2)  
C2 0.034(2) 0.037(2) 0.049(2) -0.001(2) 0.0108(18) 0.0041(18)  
C1 0.036(2) 0.049(2) 0.052(3) -0.002(2) 0.0103(18) 0.002(2)  
C10 0.039(2) 0.037(2) 0.054(3) -0.003(2) 0.006(2) -0.0004(19)  
C7 0.043(2) 0.054(3) 0.061(3) 0.005(2) 0.008(2) -0.007(2)

\_geom\_special\_details

;

All esds (except the esd in the dihedral angle between two l.s. planes) are estimated using the full covariance matrix. The cell esds are taken into account individually in the estimation of esds in distances, angles and torsion angles; correlations between esds in cell parameters are only used when they are defined by crystal symmetry. An approximate (isotropic)

treatment of cell esds is used for estimating esds involving l.s. planes.

;

loop\_

\_geom\_bond\_atom\_site\_label\_1

\_geom\_bond\_atom\_site\_label\_2

\_geom\_bond\_distance

\_geom\_bond\_site\_symmetry\_2

\_geom\_bond\_publ\_flag

Se1 C1 1.944(4) . ?

Se1 C8 1.952(4) . ?

O1 C10 1.197(5) . ?

O2 C10 1.315(5) . ?

O2 H2 0.8200 . ?

N1 C3 1.356(5) . ?

N1 N2 1.358(4) . ?

N1 C2 1.461(4) . ?

N2 C5 1.336(5) . ?

C6 C3 1.487(6) . ?

C6 H6A 0.9600 . ?

C6 H6B 0.9600 . ?

C6 H6C 0.9600 . ?

C8 C9 1.512(5) . ?

C8 H8A 0.9700 . ?

C8 H8B 0.9700 . ?

C4 C3 1.368(5) . ?

C4 C5 1.387(6) . ?

C4 H4 0.9300 . ?

C5 C7 1.495(5) . ?

C9 C10 1.506(6) . ?

C9 H9A 0.9700 . ?

C9 H9B 0.9700 . ?

C2 C1 1.503(6) . ?

C2 H2A 0.9700 . ?

C2 H2B 0.9700 . ?

C1 H1A 0.9700 . ?

C1 H1B 0.9700 . ?

C7 H7A 0.9600 . ?



C7 H7B 0.9600 . . ?  
C7 H7C 0.9600 . . ?

loop\_

\_geom\_angle\_atom\_site\_label\_1  
\_geom\_angle\_atom\_site\_label\_2  
\_geom\_angle\_atom\_site\_label\_3  
\_geom\_angle  
\_geom\_angle\_site\_symmetry\_1  
\_geom\_angle\_site\_symmetry\_3  
\_geom\_angle\_publ\_flag

C1 Se1 C8 97.90(18) . . ?  
C10 O2 H2 109.5 . . ?  
C3 N1 N2 111.9(3) . . ?  
C3 N1 C2 127.9(3) . . ?  
N2 N1 C2 119.8(3) . . ?  
C5 N2 N1 105.2(3) . . ?  
C3 C6 H6A 109.5 . . ?  
C3 C6 H6B 109.5 . . ?  
H6A C6 H6B 109.5 . . ?  
C3 C6 H6C 109.5 . . ?  
H6A C6 H6C 109.5 . . ?  
H6B C6 H6C 109.5 . . ?  
C9 C8 Se1 109.4(3) . . ?  
C9 C8 H8A 109.8 . . ?  
Se1 C8 H8A 109.8 . . ?  
C9 C8 H8B 109.8 . . ?  
Se1 C8 H8B 109.8 . . ?  
H8A C8 H8B 108.2 . . ?  
C3 C4 C5 107.0(4) . . ?  
C3 C4 H4 126.5 . . ?  
C5 C4 H4 126.5 . . ?  
N1 C3 C4 105.7(3) . . ?  
N1 C3 C6 122.5(4) . . ?  
C4 C3 C6 131.8(4) . . ?  
N2 C5 C4 110.2(4) . . ?  
N2 C5 C7 120.1(4) . . ?  
C4 C5 C7 129.6(4) . . ?  
C10 C9 C8 112.4(3) . . ?  
C10 C9 H9A 109.1 . . ?  
C8 C9 H9A 109.1 . . ?  
C10 C9 H9B 109.1 . . ?  
C8 C9 H9B 109.1 . . ?  
H9A C9 H9B 107.9 . . ?  
N1 C2 C1 111.6(3) . . ?  
N1 C2 H2A 109.3 . . ?  
C1 C2 H2A 109.3 . . ?  
N1 C2 H2B 109.3 . . ?  
C1 C2 H2B 109.3 . . ?  
H2A C2 H2B 108.0 . . ?  
C2 C1 Se1 113.6(3) . . ?  
C2 C1 H1A 108.8 . . ?  
Se1 C1 H1A 108.8 . . ?  
C2 C1 H1B 108.8 . . ?

Se1 C1 H1B 108.8 . . ?  
H1A C1 H1B 107.7 . . ?  
O1 C10 O2 123.0(4) . . ?  
O1 C10 C9 124.5(4) . . ?  
O2 C10 C9 112.5(4) . . ?  
C5 C7 H7A 109.5 . . ?  
C5 C7 H7B 109.5 . . ?  
H7A C7 H7B 109.5 . . ?  
C5 C7 H7C 109.5 . . ?  
H7A C7 H7C 109.5 . . ?  
H7B C7 H7C 109.5 . . ?

loop\_

\_geom\_torsion\_atom\_site\_label\_1  
\_geom\_torsion\_atom\_site\_label\_2  
\_geom\_torsion\_atom\_site\_label\_3  
\_geom\_torsion\_atom\_site\_label\_4  
\_geom\_torsion  
\_geom\_torsion\_site\_symmetry\_1  
\_geom\_torsion\_site\_symmetry\_2  
\_geom\_torsion\_site\_symmetry\_3  
\_geom\_torsion\_site\_symmetry\_4  
\_geom\_torsion\_publ\_flag  
C3 N1 N2 C5 0.8(4) . . . . ?  
C2 N1 N2 C5 174.4(3) . . . . ?  
C1 Se1 C8 C9 172.9(3) . . . . ?  
N2 N1 C3 C4 -0.6(5) . . . . ?  
C2 N1 C3 C4 -173.5(4) . . . . ?  
N2 N1 C3 C6 -178.5(4) . . . . ?  
C2 N1 C3 C6 8.5(7) . . . . ?  
C5 C4 C3 N1 0.2(5) . . . . ?  
C5 C4 C3 C6 177.8(5) . . . . ?  
N1 N2 C5 C4 -0.6(5) . . . . ?  
N1 N2 C5 C7 177.5(4) . . . . ?  
C3 C4 C5 N2 0.3(5) . . . . ?  
C3 C4 C5 C7 -177.6(4) . . . . ?  
Se1 C8 C9 C10 178.9(3) . . . . ?  
C3 N1 C2 C1 77.4(5) . . . . ?  
N2 N1 C2 C1 -95.1(4) . . . . ?  
N1 C2 C1 Se1 179.4(3) . . . . ?  
C8 Se1 C1 C2 -89.2(3) . . . . ?  
C8 C9 C10 O1 -13.3(7) . . . . ?  
C8 C9 C10 O2 168.4(4) . . . . ?

\_diffraction\_measured\_fraction\_theta\_max 0.999  
\_diffraction\_reflns\_theta\_full 27.51  
\_diffraction\_measured\_fraction\_theta\_full 0.999  
\_refine\_diff\_density\_max 0.436  
\_refine\_diff\_density\_min -0.415  
\_refine\_diff\_density\_rms 0.087
